# Supplementary material for: Uncovering the origin of Z-configured double bonds in polyketides: intermediate E-double bond formation during borrelidin biosynthesis
Source: Royal Society of Chemistry journal article supplement (doi:10.1039/c4sc00883a), 2014-01-01
Supplement: c4sc00883a1.pdf [file c4sc00883a1.pdf]

# Uncovering the origin of *Z*-configured double bonds in polyketides: intermediate *E*-double bond formation during borrelidin biosynthesis

*Nadine Kandziora, Jennifer N. Andexer, Steven J. Moss, Barrie Wilkinson, Peter F. Leadlay and Frank Hahn*

## Supporting information

### Contents

|                                                   |      |
|---------------------------------------------------|------|
| Chemistry methods and materials                   | S-2  |
| Biochemistry methods and materials                | S-2  |
| Synthetic procedures                              | S-3  |
| Protein expression and purification               | S-12 |
| Enzyme activity assays                            | S-13 |
| Product derivatization and configuration analysis | S-15 |
| NMR analysis of the large-scale BorDH3 assay      | S-18 |
| NMR analysis of pre-borrelidin                    | S-20 |
| References supporting information                 | S-24 |
| NMR spectra of synthetic compounds                | S-25 |
| Mass spectra of synthetic compounds               | S-36 |

## Chemistry methods and materials

All reactions were performed in oven dried glassware under an atmosphere of argon gas unless otherwise stated. Dry solvents were purchased from Sigma-Aldrich and Acros or taken out of a solvent system from M. Braun. Dry reagents were ordered from Sigma-Aldrich, Fluka, Acros, ABCR and Roth. NMR spectra were recorded with Bruker DRX-500, DPX-400 and AVANCE-400 with the residual solvent signal as internal standard.<sup>[1]</sup> The solvents are given with the data. Multiplicities are described using the following abbreviations: s = singlet, d = doublet, t = triplet, q = quartet, m = multiplet, br = broad. <sup>13</sup>C NMR spectra are reported as values in ppm relative to the residual solvent signal as internal standards.<sup>[1]</sup> The multiplicities are elucidated using the distortionless enhancement by polarisation transfer (DEPT) spectral editing technique, with secondary pulses at 90° and 135°. Multiplicities are reported using the following abbreviations: q (quaternary carbon), t (tertiary carbon = methine), s (secondary carbon = methylene), p = (primary carbon = methyl). High resolution mass spectra are obtained with a Micromass LCT via loop-mode injection from a Waters (Alliance 2695) HPLC system. Alternatively a Micromass Q-TOF in combination with a Waters Aquity Ultraperformance LC system is employed. Ionisation is achieved by ESI or APCI. Modes of ionisation, calculated and found mass are given. Reversed phase-HPLC-applications were performed with membrane-filtrated and double distilled water as well as commercial available HPLC-grade solvents (methanol or acetonitrile), which have been degased with ultrasound. Preparative HPLC was operated at a Merck Hitachi LaChrome HPLC (Pump L-7150, Interface D-7000, Diode Array Detector L-7450). The following stationary phases were used: (C18-SP) Trentec Reprisil-Pur 120 C18 AQ 5µm, 250 mm \* Ø 8 mm, corresponding precolumn cartridge, 40 mm \* Ø 8 mm; (CN-SP) Trentec Reprisil 100 CN 5µm, 250 mm \* Ø 8 mm, corresponding precolumn cartridge, 40 mm \* Ø 8 mm. Alternatively preparative HPLC was performed with a Varian HPLC (Pumps Prepstar Model 218, Variable wavelength detector Prostar ( $\lambda = 248$  nm) with parallel mass detection (Micromass Type ZMD ESI-Quad-Spectrometer) under use of a C18-P<sub>[B]</sub> stationary phase. Solvents, columns, operating procedures and retention times ( $t_R$ ) are given with the corresponding experimental and analytical data. (Abbreviations: PE= petroleum ether; EtOAc = ethyl acetate).

## Biochemistry methods and materials

All chemicals and antibiotics were purchased from Sigma-Aldrich and Roth. *E. coli* BL21(DE3)-CodonPlus-RP was purchased from Invitrogen. The expression constructs based on the pET-28a(+) vector and were prepared as stated previously.<sup>[2]</sup> Cell disruption was conducted by French Press R 125 from American Instrument Company. His-bind nickel chelate chromatography resin was purchased from Novagen. Sartorius Vivaspin 20 ultrafiltration units (10,000 MW Cut-off), Millipore Amicon<sup>®</sup> ultra centrifugal filters (30,000 MW Cut-off) and PD-10 desalting columns from GE Healthcare were used for protein concentration and buffer exchange respectively.

## Synthetic procedures<sup>[4]</sup>

### Methyl (1R,2R)-2-((S,E)-1-((tert-butyldimethylsilyl)oxy)-5-oxopent-3-en-1-yl)cyclopentane-1-carboxylate

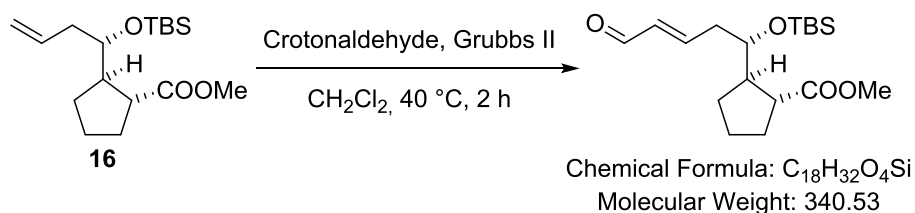

200 mg (640  $\mu$ mol, 1.0 equiv.) **16** and 1.30 mL (15.8 mmol, 25 equiv.) crotonaldehyde were solved in 40 mL CH<sub>2</sub>Cl<sub>2</sub>. 27 mg (32  $\mu$ mol, 5 mol%) Grubbs II catalyst were added and it was heated to 40 °C under reflux for 2 h. All volatiles were removed under reduced pressure and the crude product was purified by flash chromatography on silica gel (petroleum ether:EtOAc (9:1)). After drying in vacuo, 192 mg (0.57 mmol) of a brown oil were obtained (88% crude yield).

The  $\alpha,\beta$ -unsaturated aldehyde showed a strong tendency to quickly oxidize to the carboxylic acid. Therefore, the crude product of the metathesis reaction was routinely analyzed by <sup>1</sup>H NMR spectroscopy and TLC analysis. This material was subjected into the following reactions only after passing the crude product over a short filter column of silica gel. The amount that was inserted into the following reactions was calculated basing on the assumption of quantitative conversion in this step.

$R_f$  = 0.33 (PE/EtOAc 9:1); <sup>1</sup>H NMR (200 MHz, CDCl<sub>3</sub>)  $\delta$  9.51 (d,  $J$  = 7.9 Hz, 1 H, HCO), 6.89 (dt,  $J_1$  = 7.3 Hz,  $J_2$  = 15.6 Hz, 1 H, HC(O)CH), 6.05-6.18 (m, 1 H, HC(O)CHCH), 3.76-3.86 (m, 1 H, CHOTBS), 3.65 (s, 3 H, COOCH<sub>3</sub>), 2.67-2.78 (m, 1 H, CHCOOCH<sub>3</sub>), 2.39-2.55 (m, 3 H, CH<sub>2</sub>CH<sub>2</sub>CH, CH<sub>2</sub>CHOTBS), 1.57-1.97 (m, 6 H, CH<sub>2</sub>CH<sub>2</sub>CH, CH<sub>2</sub>CHCOOCH<sub>3</sub>), 0.88 (s, 9 H, OSi(CH<sub>3</sub>)<sub>2</sub>C(CH<sub>3</sub>)<sub>3</sub>), 0.07 (s, 3 H, OSi(CH<sub>3</sub>)<sub>2</sub>C(CH<sub>3</sub>)<sub>3</sub>), 0.06 (s, 3 H, OSi(CH<sub>3</sub>)<sub>2</sub>C(CH<sub>3</sub>)<sub>3</sub>).

### (1R,2R)-methyl 2-((1S,5R,6R,E)-1-[(tert-butyldimethylsilyl)oxy]-5-hydroxy-6-methyl-7-oxo-7-(phenylthio)hept-3-en-1-yl)cyclopentanecarboxylate

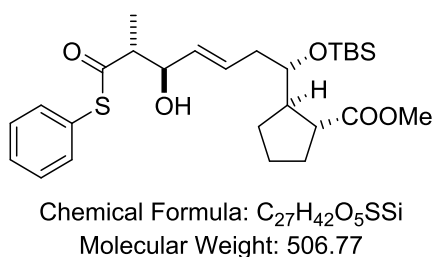

613  $\mu$ L (0.61 mmol, 3.6 equiv., 1 M in hexane) chlorodicyclohexylborane were dissolved in 7 mL Et<sub>2</sub>O and cooled to -78 °C. 81  $\mu$ L (0.75 mmol, 4.4 equiv.) dimethylethylamine and 70 mg (0.42 mmol, 2.5 equiv.) thiophenolpropionate were added dropwise and the reaction was stirred for 2 h at 0 °C. The reaction mixture was cooled to -78 °C and 60 mg (0.17 mmol, 1 equiv.) of the unsaturated aldehyde were added. The reaction was stirred for 1 h at -78 °C and then stored in a freezer at -20 °C for 18 h. 2 mL methanol, 2 mL phosphate buffer (pH 7) and 2 mL H<sub>2</sub>O<sub>2</sub> (35%) were added to the solution and the mixture was stirred for 1 h at ambient temperature. The aqueous layer was three times extracted with

CH<sub>2</sub>Cl<sub>2</sub> and the combined organic layers were dried over MgSO<sub>4</sub>. The solvent was removed *in vacuo* and the crude product was purified by flash chromatography on silica gel (petroleum ether:EtOAc (100:1) then petroleum ether:EtOAc (50:1) and petroleum ether:EtOAc (20:1)). After drying *in vacuo*, 50 mg (98.8 μmol) of a colourless oil, which consisted of an inseparable, approximately 1:1 mixture of both *anti*-aldol products, were obtained (57% yield over two steps).

**R<sub>f</sub>** = 0.17 (PE/EtOAc 9:1); **<sup>1</sup>H NMR** (400 MHz, CDCl<sub>3</sub>) δ 7.42 (s, 5 H, CH(ar)), 5.68-5.77 (m, 1 H, CH<sub>3</sub>CH=CH), 5.42-5.42 (m, 1 H, CH<sub>3</sub>CH=CH), 4.26 (dd, *J*<sub>1</sub> = 7.5 Hz, *J*<sub>2</sub> = 7.5 Hz, 1 H, CHOH), 3.64-3.69 (m, 1 H, CHOTBS), 3.66 (s, 3 H, OCH<sub>3</sub>), 2.87 (dq, *J*<sub>1</sub> = 7.5 Hz, *J*<sub>2</sub> = 7.0 Hz, 1 H, CH<sub>3</sub>CH), 2.73-2.79 (m, 1 H, CH<sub>2</sub>CH<sub>2</sub>CH), 2.44-2.51 (m, 1 H, CHCOOCH<sub>3</sub>), 2.22-2.26 (m, 1 H, CH=CHCH<sub>2</sub>), 1.83-1.92 (m, 1 H, CH<sub>2</sub>CHCOOCH<sub>3</sub>), 1.71-1.82 (m, 1 H, CH<sub>2</sub>CHCOOCH<sub>3</sub>, CH<sub>2</sub>CH<sub>2</sub>CH), 1.59-1.66 (m, 2 H, CH<sub>2</sub>CH<sub>2</sub>CH), 1.35-1.44 (m, 1 H, CH<sub>2</sub>CH<sub>2</sub>CH), 1.24 (d, *J* = 7.0 Hz, 3 H, CH<sub>3</sub>CH), 0.88 (s, 9 H, OSi(CH<sub>3</sub>)<sub>2</sub>C(CH<sub>3</sub>)<sub>3</sub>), 0.06 (s, 3 H, OSi(CH<sub>3</sub>)<sub>2</sub>C(CH<sub>3</sub>)<sub>3</sub>), 0.05 (s, 3 H, OSi(CH<sub>3</sub>)<sub>2</sub>C(CH<sub>3</sub>)<sub>3</sub>); **<sup>13</sup>C NMR** (100 MHz, CDCl<sub>3</sub>) δ 201.3 (q, 1 C, SCO), 177.7 (q, 1 C, COOCH<sub>3</sub>), 134.4 (t, 2 C, ArC), 132.3 (t, 1 C, CH=CHCH<sub>2</sub>), 130.2 (t, 1 C, CH=CHCH<sub>2</sub>), 129.4 (t, 2 C, ArC), 129.2 (t, 1 C, ArC), 127.5 (q, 1 C, ArC), 75.1 (t, 1 C, CHOH), 74.4 (t, 1 C, CHOTBS), 53.7 (t, 1 C, CH<sub>3</sub>CH), 51.7 (p, 1 C, COOCH<sub>3</sub>), 47.2 (t, 1 C, CHCOOCH<sub>3</sub>), 44.4 (t, 1 C, CH<sub>2</sub>CH<sub>2</sub>CH), 38.9 (s, 1 C, CH=CHCH<sub>2</sub>), 32.1 (s, 1 C, CH<sub>2</sub>CHCOOCH<sub>3</sub>), 30.1 (s, 1 C, CH<sub>2</sub>CH<sub>2</sub>CH), 26.1 (s, 1 C, CH<sub>2</sub>CH<sub>2</sub>CH), 25.9 (p, 3 C, OSi(CH<sub>3</sub>)<sub>2</sub>C(CH<sub>3</sub>)<sub>3</sub>), 18.0 (q, 1 C, OSi(CH<sub>3</sub>)<sub>2</sub>C(CH<sub>3</sub>)<sub>3</sub>), 15.0 (p, 1 C, CH<sub>3</sub>CH), -4.1 (p, 1 C, OSi(CH<sub>3</sub>)<sub>2</sub>C(CH<sub>3</sub>)<sub>3</sub>), -4.7 (p, 1 C, OSi(CH<sub>3</sub>)<sub>2</sub>C(CH<sub>3</sub>)<sub>3</sub>); **HRMS (ESI)** *m/z* calculated for C<sub>27</sub>H<sub>42</sub>O<sub>5</sub>SSiNa [M+Na]<sup>+</sup>: 529.2420, found: 529.2422.

(1*R*,2*R*)-methyl 2-[(5*S*,9*R*,10*R*,*E*)-9-hydroxy-2,2,3,3,10-pentanmethyl-11,16-dioxo-4-oxa-12-thia-15-aza-3-silaheptadec-7-en-5-yl]cyclopentanecarboxylate

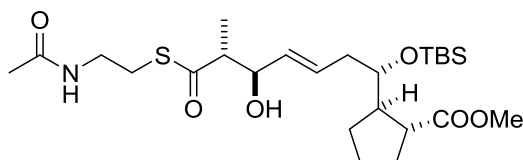

Chemical Formula: C<sub>25</sub>H<sub>45</sub>NO<sub>6</sub>SSi  
Molecular Weight: 515.78

10 mg (20 μmol, 1.0 equiv.) of the aldol product, 16 μL (91 μmol, 4.6 equiv.) DIPEA and 20 μL (188 μmol, 9.4 equiv.) HSNAC were dissolved in 1 mL DMF and stirred for 18 h at room temperature. 5 mL brine were added and the mixture was stirred for further 5 min. The mixture was three times extracted with Et<sub>2</sub>O, the organic layers were washed with brine and dried over MgSO<sub>4</sub>. The solvent was removed *in vacuo* and the crude product was purified by HPLC (HPLC (C18-ISIS) (H<sub>2</sub>O:MeOH = 80:20 {10 min}, gradient H<sub>2</sub>O:MeOH = 80:20 → 45:55 {30 min}, gradient H<sub>2</sub>O:MeOH = 45:55 → 20:80 {25 min}, gradient H<sub>2</sub>O:MeOH = 20:80 → 10:90 {30 min}, gradient H<sub>2</sub>O:MeOH = 10:90 → 0:100 {5 min}, 2.5 mL/min → 3.5 mL/min). After drying *in vacuo*, 7.2 mg (14 μmol, *t<sub>R</sub>* = 72.5 min) of a colourless oil were obtained (70% yield).

**<sup>1</sup>H NMR** (500 MHz, CDCl<sub>3</sub>) δ 5.93-6.01 (m, 1 H, NH), 5.69-5.79 (m, 1 H, CH=CHCH<sub>2</sub>), 5.37-5.47 (m, 1 H, CH=CHCH<sub>2</sub>), 4.22-4.26 (m, 1 H, CHOH), 3.67-3.71 (m, 1 H, CHOTBS), 3.68 (d, *J* = 5.6 Hz, 1 H, OMe), 3.42-3.56 (m, 2 H, NHCH<sub>2</sub>), 3.04-3.14 (m, 2 H, CH<sub>2</sub>S), 2.75-2.81 (m, 2 H, CHCH<sub>3</sub>, CHCOOH),

2.45-2.51 (m, 1 H, CH), 2.20-2.30 (m, 1 H, OH), 1.98 (s, 3 H, CHCH<sub>3</sub>), 1.88-1.95 (m, 1 H, 1x CH<sub>2</sub>CHCOOH), 1.73-1.82 (m, 2 H, 1x CH<sub>2</sub>CHCOOH, 1x CH<sub>2</sub>CH), 1.63-1.68 (m, 2 H, CH<sub>2</sub>CH<sub>2</sub>CH), 1.37-1.45 (m, 1 H, 1x CH<sub>2</sub>CH), 1.16 (d, *J* = 7.0 Hz, 3 H, CH<sub>3</sub>CO), 0.90 (s, 9 H, OSi(CH<sub>3</sub>)<sub>2</sub>C(CH<sub>3</sub>)<sub>3</sub>), 0.08 (dd, *J*<sub>1</sub> = 2.8 Hz, *J*<sub>2</sub> = 1.7 Hz, 6 H, OSi(CH<sub>3</sub>)<sub>2</sub>C(CH<sub>3</sub>)<sub>3</sub>); <sup>13</sup>C NMR (125 MHz, CDCl<sub>3</sub>) δ 203.4 (q, 1 C, SCO), 177.8 (q, 1 C, COOCH<sub>3</sub>), 170.4 (q, 1 C, CH<sub>3</sub>CONH), 132.4 (t, 1 C, CH=CHCH<sub>2</sub>), 130.5 (t, 1 C, CH=CHCH<sub>2</sub>), 75.4 (t, 1 C, CHOTBS), 74.2 (t, 1 C, CHOH), 54.1 (t, 1 C, CHCH<sub>3</sub>), 51.6 (p, 1 C, OMe), 47.2 (t, 1 C, CHCOOH), 44.5 (t, 1 C, CH), 39.4 (s, 1 C, NHCH<sub>2</sub>), 38.8 (s, 1 C, CH=CHCH<sub>2</sub>), 32.1 (s, 1 C, CH<sub>2</sub>CHCOOH), 30.2 (s, 1 C, CH<sub>2</sub>CH<sub>2</sub>CH), 26.1 (s, 1 C, CH<sub>2</sub>S), 25.8 (p, 3 C, OSi(CH<sub>3</sub>)<sub>2</sub>C(CH<sub>3</sub>)<sub>3</sub>), 23.3 (s, 1 C, CH<sub>2</sub>CH<sub>2</sub>CH), 18.0 (q, 1 C, OSi(CH<sub>3</sub>)<sub>2</sub>C(CH<sub>3</sub>)<sub>3</sub>), 15.0 (p, 1 C, CHCH<sub>3</sub>), -4.1 (p, 2 C, OSi(CH<sub>3</sub>)<sub>2</sub>C(CH<sub>3</sub>)<sub>3</sub>); **HRMS (ESI)** *m/z* calculated for C<sub>25</sub>H<sub>46</sub>NO<sub>6</sub>SSi [M+H]<sup>+</sup>: 516.2815, found: 516.2820.

(1*R*,2*R*)-methyl 2-((1*S*,5*R*,6*R*,*E*)-7-[(2-acetamidoethyl)thio]-1,5-dihydroxy-6-methyl-7-oxo hept-3-en-1-yl)cyclopentancarboxylate

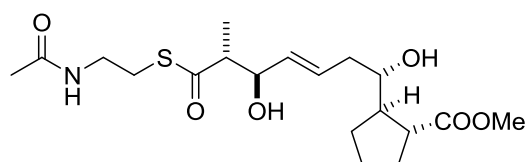

Chemical Formula: C<sub>19</sub>H<sub>31</sub>NO<sub>6</sub>S  
Molecular Weight: 401.52

30 mg (58 μmol, 1.0 equiv.) of the *bis*-protected SNAc ester were dissolved in a mixture of THF:HCOOH:H<sub>2</sub>O (6:3:1, 2 mL) and stirred for 48 h at ambient temperature. 5 mL saturated NaHCO<sub>3</sub> solution were added and the aqueous layer was three times extracted with EtOAc. The organic layers were dried over MgSO<sub>4</sub> and the solvent was removed under reduced pressure. Free TBS side products were removed by azeotropic distillation with toluene and the crude product was used in the next step without further purification.

**HRMS (ESI)** *m/z* calculated for C<sub>19</sub>H<sub>31</sub>NO<sub>6</sub>S [M+H]<sup>+</sup>: 402.1950, found: 402.1936.

(1*R*,2*R*)-2-((1*S*,5*R*,6*R*,*E*)-7-[(2-acetamidoethyl)thio]-1,5-dihydroxy-6-methyl-7-oxohept-3-en-1-yl)cyclopentanecarboxylic acid (**17a** and **17b**)

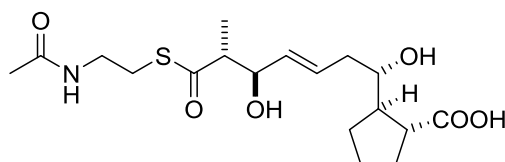

Chemical Formula: C<sub>18</sub>H<sub>29</sub>NO<sub>6</sub>S  
Molecular Weight: 387.49

The crude material (50 μmol) was dissolved in 2 mL phosphate buffer (pH 8) and 100 units of porcine liver esterase were added. It was stirred for 5 d at room temperature during which the course of the reaction was monitored by LC-MS. The reaction mixture was three times extracted with EtOAc as well as EtOAc/*i*PrOH (3:1, 1.5 mL) and the solvent was removed *in vacuo*. The crude product was purified by

preparative HPLC (C18-ISIS) (H<sub>2</sub>O:MeCN = 80:20 {10 min}, gradient H<sub>2</sub>O:MeCN = 80:20 → 0:100 {80 min}, H<sub>2</sub>O:MeCN = 0:100 {10 min}, 15 mL/min). After drying *in vacuo*, 18 mg (46.5 μmol, t<sub>R</sub> = 40.0 min) of the colourless oil, which contains a mixture of **17a** and **17b**, were obtained with full conversion and an isolated yield of 81% over two steps.

<sup>1</sup>H NMR (400 MHz, CD<sub>2</sub>Cl<sub>2</sub>) δ 6.07 (bs, 1 H, NH), 5.72-5.81 (m, 1 H, CH=CHCH<sub>2</sub>), 5.65 (dd, *J*<sub>1</sub> = 15.4 Hz, *J*<sub>2</sub> = 6.5 Hz, 1 H, CH=CHCH<sub>2</sub>), 4.24-4.31 (m, 1 H, CHOH), 3.53-3.60 (m, 1 H, CH<sub>2</sub>CHOH), 3.38-3.48 (m, 2 H, NHCH<sub>2</sub>), 3.04-3.11 (m, 1 H, 1x CH<sub>2</sub>S), 2.93-3.01 (m, 1 H, 1x CH<sub>2</sub>S), 2.84-2.90 (m, 1 H, CHCH<sub>3</sub>), 2.75-2.81 (m, 1 H, CHCOOH), 2.44-2.51 (m, 1 H, 1x CH=CHCH<sub>2</sub>), 2.05-2.24 (m, 3 H, 1x CH=CHCH<sub>2</sub>, CH, 1x CH<sub>2</sub>CH), 1.97 (s, 3 H, CH<sub>3</sub>CO), 1.80-1.92 (m, 2 H, CH<sub>2</sub>CHCOOH), 1.58-1.74 (m, 2 H, CH<sub>2</sub>CH<sub>2</sub>CH), 1.26-1.34 (m, 1 H, CH<sub>2</sub>CH<sub>2</sub>CH), 1.22 (d, *J* = 7.2 Hz, 3 H, CHCH<sub>3</sub>); <sup>13</sup>C NMR (100 MHz, CD<sub>2</sub>Cl<sub>2</sub>) δ 203.0 (q, 1 C, SCO), 176.6 (q, 1 C, COOH), 171.2 (q, 1 C, CH<sub>3</sub>CONH), 134.2 (t, 1 C, CH=CHCH<sub>2</sub>), 128.4 (t, 1 C, CH=CHCH<sub>2</sub>), 75.9 (t, 1 C, CH<sub>2</sub>CHOH), 74.8 (t, 1 C, CHOH), 54.2 (t, 1 C, CHCH<sub>3</sub>), 48.9 (t, 1 C, CH), 48.2 (t, 1 C, CHCOOH), 39.1 (s, 1 C, NHCH<sub>2</sub>), 38.9 (s, 1 C, CH=CHCH<sub>2</sub>), 30.6 (s, 1 C, CH<sub>2</sub>CHCOOH), 29.3 (s, 1 C, CH<sub>2</sub>CH<sub>2</sub>CH), 28.8 (s, 1 C, CH<sub>2</sub>CH<sub>2</sub>S), 25.7 (s, 1 C, CH<sub>2</sub>CH<sub>2</sub>CH), 22.9 (p, 1 C, CH<sub>3</sub>CO), 14.0 (p, 1 C, CHCH<sub>3</sub>); HRMS (ESI) *m/z* calculated for C<sub>18</sub>H<sub>30</sub>NO<sub>6</sub>S [M+H]<sup>+</sup>: 388.1794, found: 388.1794.

(1R,2R)-methyl 2-((S,7E,9E)-2,2,3,3,10-pentamethyl-11,16-dioxo-4-oxa-12-thia-15-aza-3-silaheptadeca-7,9-dien-5-yl)cyclopentanecarboxylate

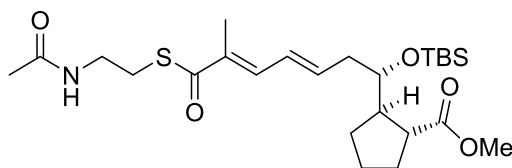

Chemical Formula: C<sub>25</sub>H<sub>43</sub>NO<sub>5</sub>SSi  
Molecular Weight: 497.77

5 mg (14.2 μmol, 1 equiv.) of **16** were subjected to metathesis reaction as described before. The product from this reaction was dissolved in 1 mL of CH<sub>2</sub>Cl<sub>2</sub> and 7.2 mg (16.5 μmol, 1.2 equiv.) of **21** were added. The solution was stirred at 50 °C overnight and the solvent was removed under reduced pressure. The crude material was purified by flash chromatography on silica gel (petroleum ether:EtOAc (1:1)). After drying *in vacuo*, 6.4 mg (12.5 μmol) of a colourless oil were obtained (88% yield over two steps).

*R*<sub>f</sub> = 0.11 (PE/EtOAc 9:1); [α]<sub>D</sub><sup>23</sup> = +8.0 (*c* = 0.6, CH<sub>2</sub>Cl<sub>2</sub>); <sup>1</sup>H NMR (500 MHz, Acetone-d<sub>6</sub>) δ 7.17 (d, *J* = 11.1 Hz, 1 H, C=CHCH), 6.53 (dd, *J*<sub>1</sub> = 11.1 Hz, *J*<sub>2</sub> = 15.0 Hz, 1 H, CH=CHCH<sub>2</sub>), 6.24-6.31 (m, 1 H, CH=CHCH<sub>2</sub>), 3.86 (q, *J* = 5.7 Hz, 1 H, CHOTBS), 3.62 (s, 3 H, OMe), 3.32 (q, *J* = 6.5 Hz, 2 H, NHCH<sub>2</sub>), 3.01-3.07 (m, 2 H, CH<sub>2</sub>S), 2.75-2.85 (m, 1 H, CHCOOMe), 2.43-2.53 (m, 3 H, CH, CH=CHCH<sub>2</sub>), 1.96 (s, 3 H, CH<sub>3</sub>CO), 1.86 (s, 3 H, CHCH<sub>3</sub>), 1.82-1.86 (m, 2 H, CH<sub>2</sub>CHCOOH), 1.68-1.82 (m, 1 H, 1x CH<sub>2</sub>CH<sub>2</sub>CH), 1.55-1.67 (m, 2 H, CH<sub>2</sub>CH<sub>2</sub>CH), 1.42-1.52 (m, 1H, 1x CH<sub>2</sub>CH<sub>2</sub>CH), 0.90 (s, 9 H, OSi(CH<sub>3</sub>)<sub>2</sub>C(CH<sub>3</sub>)<sub>3</sub>), 0.11 (2 s, 6 H, OSi(CH<sub>3</sub>)<sub>2</sub>C(CH<sub>3</sub>)<sub>3</sub>); <sup>13</sup>C NMR (125 MHz, Acetone-d<sub>6</sub>) δ 192.9 (1 C, q, SCO), 177.4 (1 C, q, COOCH<sub>3</sub>), 170.1 (1 C, q, CH<sub>3</sub>CONH), 141.4 (1 C, t, CH=CHCH<sub>2</sub>), 138.0 (1 C, t, CHCH=CH), 134.0 (1 C, q, CH<sub>3</sub>C) 128.9 (1 C, t, CH=CHCH<sub>2</sub>), 75.2 (1 C, t, CH<sub>2</sub>CHOTBS), 51.8 (1 C, p, COOCH<sub>3</sub>), 48.7 (1 C, t, CH), 45.5 (1 C, t, CHCOOCH<sub>3</sub>), 40.5 (1 C, s, CH<sub>2</sub>CHOTBS), 39.7 (1 C, s, NHCH<sub>2</sub>), 32.6 (1 C, s, CH<sub>2</sub>CHCOOCH<sub>3</sub>), 30.6 (1 C, s, CH<sub>2</sub>S), 29.2 (1 C, s, CH<sub>2</sub>CH<sub>2</sub>CH), 26.7 (1 C, s,

CH<sub>2</sub>CH<sub>2</sub>CH), 26.3 (3 C, p, OSi(CH<sub>3</sub>)<sub>2</sub>C(CH<sub>3</sub>)<sub>3</sub>), 22.8 (1 C, p, CH<sub>3</sub>C), 18.6 (1 C, q, OSi(CH<sub>3</sub>)<sub>2</sub>C(CH<sub>3</sub>)<sub>3</sub>), 12.7 (1 C, p, CH<sub>3</sub>CONH), -3.9 (1 C, p, OSi(CH<sub>3</sub>)<sub>2</sub>C(CH<sub>3</sub>)<sub>3</sub>), -4.5 (1 C, p, OSi(CH<sub>3</sub>)<sub>2</sub>C(CH<sub>3</sub>)<sub>3</sub>); **HRMS (ESI)** *m/z* calculated for C<sub>25</sub>H<sub>44</sub>NO<sub>5</sub>SSi [M+H]<sup>+</sup>: 498.2709, found: 498.2688.

(1R,2R)-methyl 2-((S,3E,5E)-7-((2-acetamidoethyl)thio)-1-hydroxy-6-methyl-7-oxohepta-3,5-dien-1-yl)cyclopentanecarboxylate

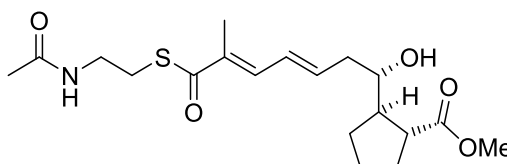

Chemical Formula: C<sub>19</sub>H<sub>29</sub>NO<sub>5</sub>S  
Molecular Weight: 383.50

3.2 mg (6.4 μmol, 1 equiv.) of the TBS-protected precursor were dissolved in 2 mL of THF : HCOOH : H<sub>2</sub>O (6 : 3 : 1) and stirred at room temperature. After two days, the reaction was quenched by the addition of saturated NaHCO<sub>3</sub> solution. After extraction with EtOAc, the combined organic layers were dried over MgSO<sub>4</sub> and the solvent removed under reduced pressure. The crude product, which was obtained as a colourless oil, was analysed by <sup>1</sup>H NMR spectroscopy and directly subjected to esterase-catalysed deprotection.

The crude material from another entry was purified by HPLC for full spectroscopic characterisation (C18-P) (H<sub>2</sub>O : MeOH = 90:10 {5 min}, gradient H<sub>2</sub>O:MeOH = 90:10 → 45:55 {45 min}, gradient H<sub>2</sub>O:MeOH = 45:55 → 0:100 {30 min}, H<sub>2</sub>O:MeOH = 0:100 {20 min}, 2.25 mL/min).

[α]<sub>D</sub><sup>23</sup> = -1.0 (*c* = 0.1, CH<sub>2</sub>Cl<sub>2</sub>); <sup>1</sup>H NMR (500 MHz, acetone-d<sub>6</sub>) δ 7.26 (bs, 1 H, NH), 7.16 (d, *J* = 11.7 Hz, 1 H, C=CHCH), 6.54 (dd, *J*<sub>1</sub> = 13.7 Hz, *J*<sub>2</sub> = 11.66 Hz, 1 H, CH=CHCH<sub>2</sub>), 6.29-6.37 (m, 1 H, CH=CHCH<sub>2</sub>), 3.61 (s, 3 H, OMe), 3.57-3.63 (m, 1 H, CHOH), 3.29-3.36 (m, 2 H, CH<sub>2</sub>NH), 3.02-3.07 (m, 2 H, CH<sub>2</sub>S), 2.75-2.78 (m, 1 H, CHCOOCH<sub>3</sub>), 2.42-2.52 (m, 1 H, 1x CH=CHCH<sub>2</sub>), 2.29-2.39 (m, 2 H, 1x CH=CHCH<sub>2</sub>, CHCHOH), 1.95 (s, 3 H, CH<sub>3</sub>CO), 1.87-1.93 (m, 1 H, 1x CH<sub>2</sub>CHCOOCH<sub>3</sub>), 1.85 (s, 3 H, CH<sub>3</sub>C=CH), 1.70-1.80 (m, 2 H, 1x CH<sub>2</sub>CHCOOCH<sub>3</sub>, 1x CH<sub>2</sub>CH<sub>2</sub>CH), 1.61-1.68 (m, 2 H, CH<sub>2</sub>CH<sub>2</sub>CH), 1.41-1.50 (m, 1 H, 1x CH<sub>2</sub>CH<sub>2</sub>CH); <sup>13</sup>C NMR (125 MHz, acetone-d<sub>6</sub>) δ 192.9 (1 C, q, SCO), 177.7 (1 C, q, COOCH<sub>3</sub>), 170.0 (1 C, q, CONH), 142.7 (1 C, t, CH=CHCH<sub>2</sub>), 138.3 (1 C, t, CCH=CH), 133.8 (1 C, q, CCH=CH), 128.4 (1 C, t, CHCH=CH), 74.5 (1 C, t, CHOH), 51.7 (1 C, p, COOCH<sub>3</sub>), 50.2 (1 C, t, CHCHOH), 46.7 (1 C, t, CHCOOCH<sub>3</sub>), 41.1 (1 C, s, CH=CHCH<sub>2</sub>), 39.8 (1 C, s, CH<sub>2</sub>NH), 32.2 (1 C, s, CH<sub>2</sub>CHCOOCH<sub>3</sub>), 30.5 (1 C, s, CH<sub>2</sub>CH<sub>2</sub>CH), 29.1 (1 C, s, CH<sub>2</sub>S), 26.4 (1 C, s, CH<sub>2</sub>CH<sub>2</sub>CH), 22.9 (1 C, p, CH<sub>3</sub>C), 12.7 (1 C, p, CH<sub>3</sub>CO); **HRMS (ESI)** *m/z* calculated for C<sub>19</sub>H<sub>29</sub>NO<sub>5</sub>SNa [M+Na]<sup>+</sup>: 406.1634, found: 406.1633.

(1R,2R)-2-((S,3E,5E)-7-((2-acetamidoethyl)thio)-1-hydroxy-6-methyl-7-oxohepta-3,5-dien-1-yl)cyclopentane-1-carboxylic acid (18)

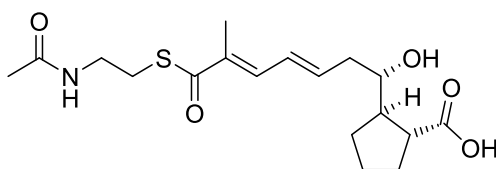

Chemical Formula: C<sub>18</sub>H<sub>27</sub>NO<sub>5</sub>S  
Molecular Weight: 369.48

The crude material from the TBS deprotection was dissolved in 1 mL phosphate buffer (pH 8) and 100 units of porcine liver esterase were added. It was stirred for 3 d at ambient temperature during which the course of the reaction was monitored by LC-MS. After conversion was complete, the crude material was purified by flash chromatography on C<sub>18</sub>-reversed phase silica gel (H<sub>2</sub>O then MeCN:H<sub>2</sub>O (1:4)). After drying *in vacuo*, 1.6 mg (4.3 μmol) of the colourless oil **18** were obtained (67% yield over two steps). Compound **18** showed partial decomposition after chromatography.

<sup>1</sup>H NMR (400 MHz, CDCl<sub>3</sub>) δ 7.17 (d, *J* = 11.1 Hz, 1 H, C=CHCH), 6.48 (dd, *J*<sub>1</sub> = 11.1 Hz, *J*<sub>2</sub> = 15.0 Hz, 1 H, CHCH=CH), 6.17-6.27 (m, 1 H, CH=CHCH<sub>2</sub>), 5.92-6.06 (m, 1 H, NH), 4.68 (s, 1 H, OH), 3.58-3.67 (m, 1 H, CHOH), 3.46 (dt, 2 H, *J*<sub>1</sub> = 6.4 Hz, *J*<sub>2</sub> = 5.9 Hz, CH<sub>2</sub>NH), 3.09 (t, 2 H, *J* = 6.3 Hz, CH<sub>2</sub>S), 2.77 (dt, 1 H, *J*<sub>1</sub> = 6.8 Hz, *J*<sub>2</sub> = 7.9 Hz, CHCOOCH<sub>3</sub>), 2.54-2.64 (m, 1 H, 1x CH=CHCH<sub>2</sub>), 2.04-2.38 (m, 3 H, 1x CH=CHCH<sub>2</sub>, CHCHOH, 1x CH<sub>2</sub>CHCOOCH<sub>3</sub>), 1.95-2.02 (2x s, 6 H, CH<sub>3</sub>CO, CH=CCH<sub>3</sub>), 1.80-1.94 (m, 2 H, 1x CH<sub>2</sub>CHCOOCH<sub>3</sub>, 1x CH<sub>2</sub>CH<sub>2</sub>CH), 1.61-1.73 (m, 2 H, CH<sub>2</sub>CH<sub>2</sub>CH), 1.27-1.33 (m, 1 H, 1x CH<sub>2</sub>CH<sub>2</sub>CH); <sup>13</sup>C NMR (100 MHz, CDCl<sub>3</sub>) δ 193.9 (1 C, q, SCO), 178.1 (1 C, q, COOH), 170.7 (1 C, q, CONH), 139.5 (1 C, t, CH=CHCH<sub>2</sub>), 137.3 (1 C, t, CCH=CH), 133.9 (1 C, q, CCH=CH), 129.1 (1 C, t, CHCH=CH), 75.9 (1 C, t, CHOH), 49.2 (1 C, t, CHCHOH), 48.3 (1 C, t, CHCOOH), 40.5 (1 C, s, CH=CHCH<sub>2</sub>), 40.0 (1 C, s, CH<sub>2</sub>NH), 30.7 (1 C, s, CH<sub>2</sub>CH<sub>2</sub>CH), 29.9 (1 C, s, CH<sub>2</sub>CHCOOH), 28.7 (1 C, s, CH<sub>2</sub>S), 25.8 (1 C, s, CH<sub>2</sub>CH<sub>2</sub>CH), 23.4 (1 C, p, CH<sub>3</sub>C), 12.9 (1 C, p, CH<sub>3</sub>CO); HRMS (ESI) *m/z* calculated for C<sub>18</sub>H<sub>26</sub>NO<sub>5</sub>S [M-H]<sup>-</sup>: 368.1532, found: 368.1523.

(1R,2R)-methyl 2-[(S,3E,5E)-1-[(*tert*-butyldimethylsilyl)oxy]-7-methoxy-6-methyl-7-oxo-hepta-3,5-diene-1-yl]cyclopentane carboxylate

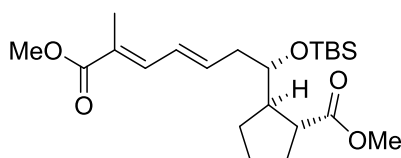

Chemical Formula: C<sub>22</sub>H<sub>38</sub>O<sub>5</sub>Si  
Molecular Weight: 410.63

8.8 mg (28 μmol, 1.0 equiv.) of olefin **16** were subjected to olefin cross metathesis with crotonaldehyde and second generation Grubbs catalyst and purified as described previously. The resulting unsaturated aldehyde was solved in 2 mL CH<sub>2</sub>Cl<sub>2</sub> and 11 mg (31 μmol, 1.1 equiv) of **22** were added. The resulting solution was stirred at 50 °C for 21 h. The solvent was removed under reduced pressure and the crude product was purified by flash chromatography on C<sub>18</sub>-reversed phase silica gel (MeCN:H<sub>2</sub>O (2:3)). After drying *in vacuo*, 7.4 mg (18 μmol) of a colourless oil, the *E,E*-configured methyl ester, were obtained (64% yield over two steps).



$R_f = 0.4$  (PE/EtOAc 9:1);  $[\alpha]_D^{23} = +5.8$  ( $c = 0.7$ ,  $\text{CH}_2\text{Cl}_2$ );  $^1\text{H NMR}$  (500 MHz, benzene- $d_6$ )  $\delta$  7.46 (d,  $J = 11.4$  Hz, 1 H,  $\text{C}=\text{CHCH}$ ), 6.37 (dd,  $J_1 = 12.5$  Hz,  $J_2 = 13.9$  Hz, 1 H,  $\text{CH}=\text{CHCH}_2$ ), 5.90-5.96 (m, 1 H,  $\text{CH}=\text{CHCH}_2$ ), 3.53-3.57 (m, 1 H,  $\text{CHOTBS}$ ), 3.44 (s, 3 H,  $\text{OCH}_3$ ), 3.37 (s, 3 H,  $\text{OCH}_3$ ), 2.81-2.87 (m, 1 H,  $\text{CHCOOCH}_3$ ), 2.58-2.64 (m, 1 H,  $\text{CH}_2\text{CH}_2\text{CH}$ ), 2.29-2.38 (m, 1 H,  $\text{CH}_2\text{CHOTBS}$ ), 2.21-2.26 (m, 1 H,  $\text{CH}_2\text{CHOTBS}$ ), 1.99 (s, 3 H,  $\text{CH}_3\text{CCH}$ ), 1.78-1.88 (m, 2 H,  $\text{CH}_2\text{CHCOOCH}_3$ ), 1.62-1.70 (m, 1 H, 1x  $\text{CH}_2\text{CH}_2\text{CH}$ ), 1.55-1.62 (m, 1 H, 1x  $\text{CH}_2\text{CH}_2\text{CH}$ ), 1.47-1.54 (m, 1 H,  $\text{CH}_2\text{CH}_2\text{CH}$ ), 1.27-1.32 (m, 1 H,  $\text{CH}_2\text{CH}_2\text{CH}$ ), 0.94 (s, 9 H,  $\text{OSi}(\text{CH}_3)_2\text{C}(\text{CH}_3)_3$ ), 0.04 (s, 3 H,  $\text{OSi}(\text{CH}_3)_2\text{C}(\text{CH}_3)_3$ ), 0.01 (s, 3 H,  $\text{OSi}(\text{CH}_3)_2\text{C}(\text{CH}_3)_3$ );  $^{13}\text{C NMR}$  (125 MHz, benzene- $d_6$ )  $\delta$  176.8 (q, 1 C,  $\text{CHCOOCH}_3$ ), 168.5 (q, 1 C,  $\text{CCOOCH}_3$ ), 138.6 (t, 1 C,  $\text{CH}=\text{CHCH}_2$ ), 138.5 (t, 1 C,  $\text{CCH}=\text{CH}$ ), 128.9 (t, 1 C,  $\text{CH}=\text{CHCH}_2$ ), 126.2 (q, 1 C,  $\text{CH}_3\text{CCH}$ ), 74.7 (t, 1 C,  $\text{CHOTBS}$ ), 51.4 (p, 1 C,  $\text{OCH}_3$ ), 51.3 (p, 1 C,  $\text{OCH}_3$ ), 48.2 (t, 1 C,  $\text{CHCOOCH}_3$ ), 44.8 (t, 1 C,  $\text{CH}_2\text{CH}_2\text{CH}$ ), 40.3 (s, 1 C,  $\text{CH}_2\text{CHOTBS}$ ), 32.3 (s, 1 C,  $\text{CH}_2\text{CHCOOCH}_3$ ), 30.3 (s, 1 C,  $\text{CH}_2\text{CH}_2\text{CH}$ ), 26.5 (s, 1 C,  $\text{CH}_2\text{CH}_2\text{CH}$ ), 26.1 (p, 3 C,  $\text{OSi}(\text{CH}_3)_2\text{C}(\text{CH}_3)_3$ ), 18.3 (q, 1 C,  $\text{OSi}(\text{CH}_3)_2\text{C}(\text{CH}_3)_3$ ), 12.9 (p, 1 C,  $\text{CH}_3\text{CCH}$ ), -3.9 (s, 1 C,  $\text{OSi}(\text{CH}_3)_2\text{C}(\text{CH}_3)_3$ ), -4.4 (s, 1 C,  $\text{OSi}(\text{CH}_3)_2\text{C}(\text{CH}_3)_3$ ); **HRMS (ESI)**  $m/z$  calculated for  $\text{C}_{22}\text{H}_{39}\text{O}_5\text{Si}$   $[\text{M}+\text{H}]^+$ : 411.2567, found: 411.2563.

(1R,2R)-methyl 2-{(S,3E,5E)-1-hydroxy-7-methoxy-6-methyl-7-oxohepta-3,5-dien-1-yl} cyclopentancarboxylat (19)

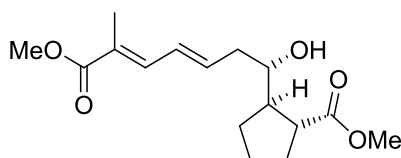

Chemical Formula:  $\text{C}_{16}\text{H}_{24}\text{O}_5$   
Molecular Weight: 296.36

7.4 mg (18  $\mu\text{mol}$ , 1 equiv.) of the TBS-protected precursor were dissolved in 2 mL THF :  $\text{HCOOH}$  :  $\text{H}_2\text{O}$  (6 : 3 : 1) and stirred at room temperature. Monitoring of the reaction by LC-MS showed full conversion after two days and the reaction was quenched by the addition of saturated  $\text{NaHCO}_3$  solution. After extraction with EtOAc, the combined organic layers were dried over  $\text{MgSO}_4$  and the solvent removed under reduced pressure. The crude material was purified by flash chromatography on  $\text{C}_{18}$ -reversed phase silica gel ( $\text{H}_2\text{O}$  then  $\text{MeCN}:\text{H}_2\text{O}$  (1:4)). After drying in vacuo, 3.3 mg (11.1  $\mu\text{mol}$ ) of the colourless oil **19** were obtained (62% yield).

$R_f = 0.21$  (PE/EtOAc 9:1);  $[\alpha]_D^{23} = -1.0$  ( $c = 0.1$ ,  $\text{CH}_2\text{Cl}_2$ );  $^1\text{H NMR}$  (400 MHz,  $\text{CDCl}_3$ )  $\delta$  7.17 (d,  $J = 11.4$  Hz, 1 H,  $\text{C}=\text{CH}=\text{CH}$ ), 6.43 (dt,  $J_1 = 14.9$  Hz,  $J_2 = 11.3$  Hz, 1 H,  $\text{CH}=\text{CHCH}_2$ ), 6.13 (dt,  $J_1 = 14.9$  Hz,  $J_2 = 7.5$  Hz, 1 H,  $\text{CH}=\text{CHCH}_2$ ), 3.75 (s, 3 H,  $\text{OCH}_3$ ), 3.70 (s, 3 H,  $\text{OCH}_3$ ), 3.13-3.17 (dt,  $J_1 = 3.1$  Hz,  $J_2 = 8.1$  Hz, 1 H,  $\text{CHOH}$ ), 2.71 (dt,  $J_1 = 8.2$  Hz,  $J_2 = 8.2$  Hz, 1 H,  $\text{CHCOOCH}_3$ ), 2.44-2.54 (m, 1 H,  $\text{CHCH}_2\text{CHOTBS}$ ), 2.22-2.34 (m, 2 H, 1x  $\text{CHCH}_2\text{CHOTBS}$ , 1x  $\text{CHCHCHOH}$ ), 1.93 (s, 3 H,  $\text{CH}_3\text{CCH}$ ), 1.91-2.00 (m, 1 H, 1x  $\text{CH}_2\text{CHCOOH}$ ), 1.81-1.91 (m, 2 H, 1x  $\text{CH}_2\text{CHCOOH}$ , 1x  $\text{CH}_2\text{CH}$ ), 1.64-1.74 (m, 2 H,  $\text{CH}_2\text{CH}_2\text{CH}$ ), 1.22-1.38 (m, 1 H, 1x  $\text{CH}_2\text{CH}$ );  $^{13}\text{C NMR}$  (100 MHz,  $\text{CDCl}_3$ )  $\delta$  177.7 (q, 1 C,  $\text{CHCOOCH}_3$ ), 169.2 (q, 1 C,  $\text{CCOOCH}_3$ ), 138.4 (t, 2 C,  $\text{CH}=\text{CHCH}_2$ ,  $\text{CCH}=\text{CH}$ ), 128.9 (t, 1 C,  $\text{CH}=\text{CHCH}_2$ ), 126.0 (q, 1 C,  $\text{CH}_3\text{CCH}$ ), 75.3 (t, 1 C,  $\text{CHOH}$ ), 52.1 (p, 1 C,  $\text{OCH}_3$ ), 51.9 (p, 1 C,  $\text{OCH}_3$ ), 49.7 (t, 1 C,  $\text{CHCOOCH}_3$ ), 47.8 (t, 1 C,  $\text{CH}_2\text{CH}_2\text{CH}$ ), 40.4 (s, 1 C,  $\text{CHCH}_2\text{CHOH}$ ), 31.1 (s, 1 C,  $\text{CH}_2\text{CHCOOCH}_3$ ), 30.0 (s, 1 C,  $\text{CH}_2\text{CH}_2\text{CH}$ ), 25.5 (s, 1 C,  $\text{CH}_2\text{CH}_2\text{CH}_2$ ), 12.8 (p, 1 C,  $\text{CH}_3\text{CCH}$ ); **HRMS (ESI)**  $m/z$  calculated for  $\text{C}_{16}\text{H}_{24}\text{O}_5\text{Na}$   $[\text{M}+\text{Na}]^+$ : 319.1521, found: 319.1525.

(1R,2R)-methyl 2-{(S,3E,5Z)-1-[(tert-butyl)dimethylsilyl]oxy}-7-methoxy-6-methyl-7-oxohepta-3,5-diene-1-yl}cyclopentane carboxylate

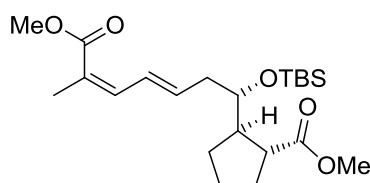

Chemical Formula: C<sub>22</sub>H<sub>38</sub>O<sub>5</sub>Si  
Molecular Weight: 410.63

190 mg (720 μmol, 12 equiv.) 18-crown-6 and 50 mg (360 μmol, 6 equiv.) K<sub>2</sub>CO<sub>3</sub> were suspended in 2 mL toluene and stirred for 1 h at room temperature. The suspension was cooled to -20 °C and 20 mg (6 μmol, 1 equiv.) **23** were added. 25 mg (60 μmol, 1.0 equiv.) of the precursor aldehyde were added and the reaction was stirred for further 5 h at 0 °C. After the addition of 10 mL brine, the aqueous layer was three times extracted with Et<sub>2</sub>O and the organic layers were dried over MgSO<sub>4</sub>. The solvent was removed under reduced pressure and the crude product was purified by flash chromatography on silica gel (petroleum ether:EtOAc (50:1) then petroleum ether:EtOAc (20:1) and petroleum ether:EtOAc (10:1)). After drying *in vacuo*, 11 mg (28 μL) of a colourless oil were obtained (47% yield over two steps).

$R_f$  = 0.6 (PE/EtOAc 9:1);  $[\alpha]_D^{23}$  = +14.4 ( $c$  = 0.8, CH<sub>2</sub>Cl<sub>2</sub>); **<sup>1</sup>H NMR** (500 MHz, benzene-d<sub>6</sub>) δ 7.64 (dd,  $J_1$  = 12.5 Hz,  $J_2$  = 13.8 Hz, 1 H, CH=CHCH<sub>2</sub>), 6.27 (d,  $J$  = 10.9 Hz, 1 H, C=CH=CH), 5.93-6.01 (m, 1 H, CH=CHCH<sub>2</sub>), 3.57-3.61 (m, 1 H, CHOTBS), 3.44 (s, 3 H, OCH<sub>3</sub>), 3.40 (s, 3 H, OCH<sub>3</sub>), 2.80-2.86 (m, 1 H, CHCOOCH<sub>3</sub>), 2.66-2.73 (m, 1 H, CH<sub>2</sub>CH<sub>2</sub>CH), 2.28-2.43 (m, 2 H, CH<sub>2</sub>CHOTBS), 1.87 (s, 3 H, CH<sub>3</sub>CCH), 1.77-1.86 (m, 2 H, CH<sub>2</sub>CHCOOCH<sub>3</sub>), 1.64-1.73 (m, 1 H, CH<sub>2</sub>CH<sub>2</sub>CH), 1.54-1.62 (m, 1 H, CH<sub>2</sub>CH<sub>2</sub>CH), 1.45-1.53 (m, 1 H, CH<sub>2</sub>CH<sub>2</sub>CH), 1.20-1.29 (m, 1 H, CH<sub>2</sub>CH<sub>2</sub>CH), 0.98 (s, 9 H, OSi(CH<sub>3</sub>)<sub>2</sub>C(CH<sub>3</sub>)<sub>3</sub>), 0.06 (s, 3 H, OSi(CH<sub>3</sub>)<sub>2</sub>C(CH<sub>3</sub>)<sub>3</sub>), 0.05 (s, 3 H, OSi(CH<sub>3</sub>)<sub>2</sub>C(CH<sub>3</sub>)<sub>3</sub>); **<sup>13</sup>C NMR** (125 MHz, benzene-d<sub>6</sub>) δ 176.9 (q, 1 C, CHCOOCH<sub>3</sub>), 167.5 (q, 1 C, CCOOCH<sub>3</sub>), 141.3 (t, 1 C, CH=CHCH<sub>2</sub>), 137.5 (t, 1 C, CCH=CH), 130.9 (t, 1 C, CH=CHCH<sub>2</sub>), 124.7 (q, 1 C, CH<sub>3</sub>CCH), 75.2 (t, 1 C, CHOTBS), 51.3 (p, 1 C, OCH<sub>3</sub>), 50.9 (p, 1 C, OCH<sub>3</sub>), 48.2 (t, 1 C, CHCOOCH<sub>3</sub>), 45.3 (t, 1 C, CH<sub>2</sub>CH<sub>2</sub>CH), 39.7 (s, 1 C, CH<sub>2</sub>CHOTBS), 32.3 (s, 1 C, CH<sub>2</sub>CHCOOCH<sub>3</sub>), 30.2 (s, 1 C, CH<sub>2</sub>CH<sub>2</sub>CH), 26.4 (s, 1 C, CH<sub>2</sub>CH<sub>2</sub>CH), 26.2 (p, 3 C, OSi(CH<sub>3</sub>)<sub>2</sub>C(CH<sub>3</sub>)<sub>3</sub>), 20.9 (q, 1 C, OSi(CH<sub>3</sub>)<sub>2</sub>C(CH<sub>3</sub>)<sub>3</sub>), 18.3 (p, 1 C, CH<sub>3</sub>CCH), -3.9 (s, 1 C, OSi(CH<sub>3</sub>)<sub>2</sub>C(CH<sub>3</sub>)<sub>3</sub>), -4.5 (s, 1 C, OSi(CH<sub>3</sub>)<sub>2</sub>C(CH<sub>3</sub>)<sub>3</sub>); **HRMS (ESI)**  $m/z$  calculated for C<sub>22</sub>H<sub>38</sub>O<sub>5</sub>NaSi [M+Na]<sup>+</sup>: 433.2386, found: 433.2387.

(1R,2R)-methyl 2-{(S,3E,5Z)-1-hydroxy-7-methoxy-6-methyl-7-oxohepta-3,5-dien-1-yl}cyclopentancarboxylat (**20**)

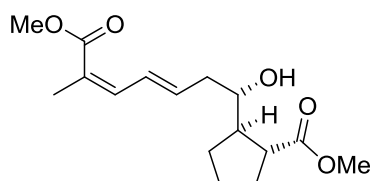

Chemical Formula: C<sub>16</sub>H<sub>24</sub>O<sub>5</sub>  
Molecular Weight: 296.36

2 mg (7  $\mu\text{mol}$ , 1 equiv.) of the TBS-protected precursor were dissolved in 1 mL of THF:HCOOH:H<sub>2</sub>O (6:3:1) and stirred at room temperature. Monitoring of the reaction by LC-MS showed full conversion after two days and the reaction was quenched by the addition of saturated NaHCO<sub>3</sub> solution. After extraction with EtOAc, the combined organic layers were dried over MgSO<sub>4</sub> and the solvent removed under reduced pressure. The crude material was purified by HPLC (C18-P<sub>[B]</sub>) (H<sub>2</sub>O:MeOH = 80:20 {5 min}, gradient H<sub>2</sub>O:MeOH = 80:20  $\rightarrow$  0:100 {95 min}, 4 mL/min  $\rightarrow$  5 mL/min). After drying *in vacuo*, 1 mg (4  $\mu\text{mol}$ ,  $t_{\text{R}}$ =72.3 min) of the colourless oil **20** was obtained (57% yield).

$[\alpha]_{\text{D}}^{23} = +1.0$  ( $c = 0.1$ , CH<sub>2</sub>Cl<sub>2</sub>); **<sup>1</sup>H NMR** (500 MHz, benzene-d<sub>6</sub>)  $\delta$  7.14-7.20 (m, 1 H, CH=CHCH<sub>2</sub>), 6.42 (d,  $J = 11.2$  Hz, 1 H, C=CH=CH), 5.94-6.01 (m, 1 H, CH=CHCH<sub>2</sub>), 3.76 (s, 3 H, OCH<sub>3</sub>), 3.69 (s, 3 H, OCH<sub>3</sub>), 3.64-3.67 (m, 1 H, CHOH), 3.48-3.54 (m, 2 H, CH<sub>2</sub>CHOTBS), 2.66-2.72 (m, 1 H, CHCOOCH<sub>3</sub>), 1.95 (s, 3 H, CH<sub>3</sub>CCH), 1.17-1.89 (m, 6 H, 3x CH<sub>2</sub>(cyclopentane)); **HRMS (ESI)**  $m/z$  calculated for C<sub>16</sub>H<sub>24</sub>O<sub>5</sub>Na [M+Na]<sup>+</sup>: 319.1521, found: 319.1516.

## Protein expression and purification

Plasmids pET28a(+)-BorDH2, pET28a(+)-BorDH3 and pET28a(+)-BorDH3-H48A were available from a previous study.<sup>[2]</sup> For protein expression, chemically competent *E. coli* BL21(DE3)-CodonPlus-RP cells were transformed with the corresponding plasmids. Single colonies were used to inoculate 50-100 mL 2TY medium (16 g tryptone (Duchefa), 10 g yeast extract (Sigma), 5 g NaCl in 1 L). Cultures were grown to an OD<sub>600</sub> of 0.6 at 37 °C, protein production was induced with 0.1 mM IPTG and shaken at room temperature for 22 hours. Cells were harvested by centrifugation (4,500 rpm, 4 °C, 30 min) and stored at -20 °C.

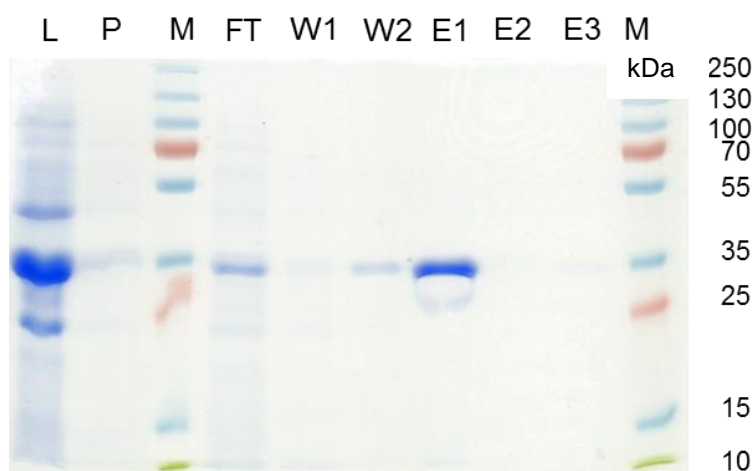

**Figure S1:** SDS-PAGE after protein purification by affinity chromatography; L: lysate, p: pellet, FT: flow through, W1-W2: wash steps, E1-E3: elution steps, M: Marker (PageRuler Plus Prestained Protein Ladder).

For purification, approximately 2 g cells were resuspended in 20 mL Binding Buffer (40 mM Tris-HCl, 100 mM NaCl, pH 7.8) and broken by cell disruption in a French Press. After centrifugation at 8,500 rpm for 45 min the resulting crude extract was passed through a Ni-NTA column (1-2 mL bed volume), the column was washed sequentially with each 5 column volumes of binding buffer containing 0 mM imidazole and 20 mM imidazole. The target protein was eluted with each 5 column volumes of 100 mM, 200 mM and 500 mM imidazole in Binding Buffer (Figure S1). Finally the eluate was concentrated, the buffer was replaced by Storage Buffer (25 mM Hepes, 150 mM NaCl, pH 6.8) and immediately used for activity assays. Alternatively, the protein solution was supplemented with 50% glycerol and stored at -20 °C.

## Enzyme activity assays

Activity assays were carried out in a total volume of 100  $\mu\text{L}$  containing 12 mM of **17a/b** and up to 3 mg/mL of the corresponding BorDH enzyme in 25 mM HEPES (pH 7.5, 100 mM NaCl). Reactions were incubated at 37  $^{\circ}\text{C}$  for 16 h and extracted with 3 x 1 mL of ethyl acetate. After evaporation of the solvent, the sample was resuspended in 50  $\mu\text{L}$  of methanol and analysed by UPLC-MS. All traces were compared to authentic standards. Reactions without enzyme or active site mutants served as controls.

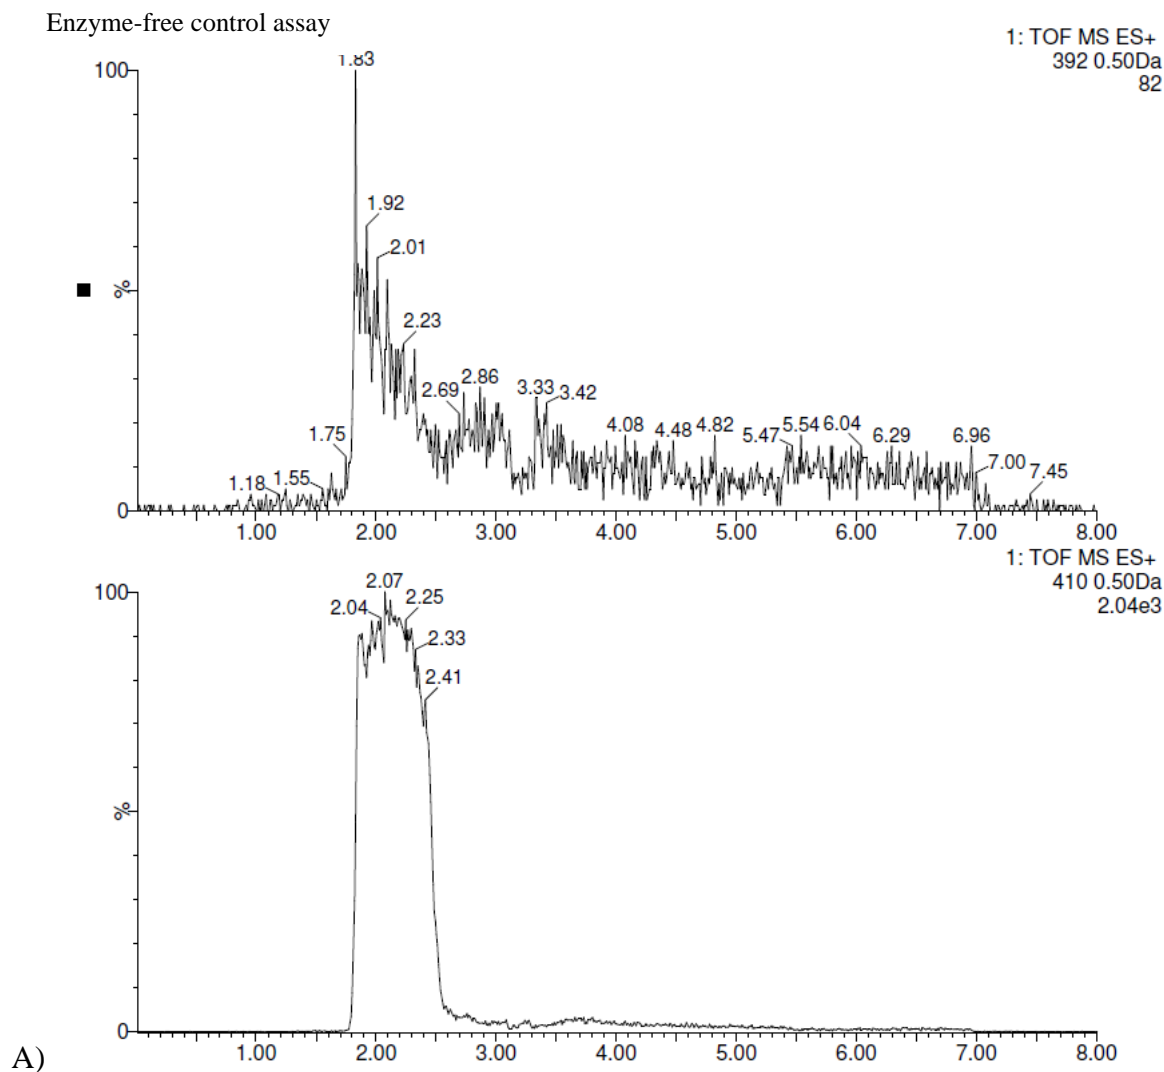

BorDH3 mutant assay

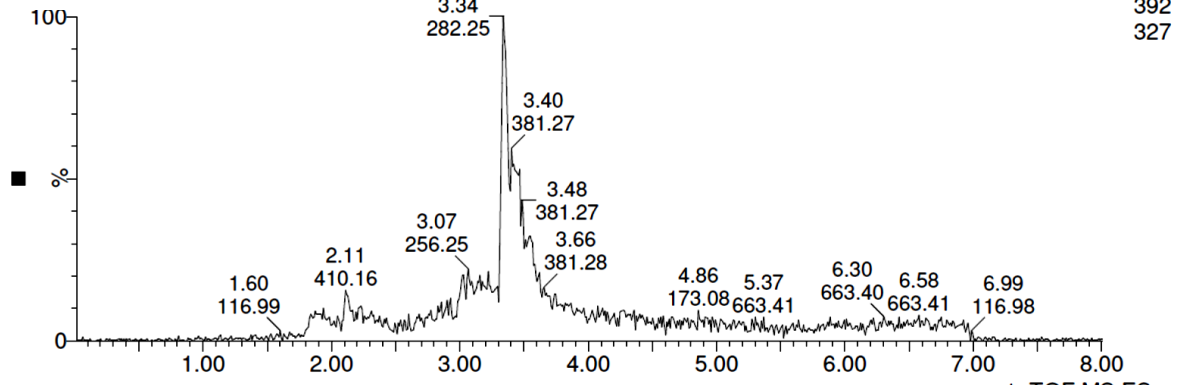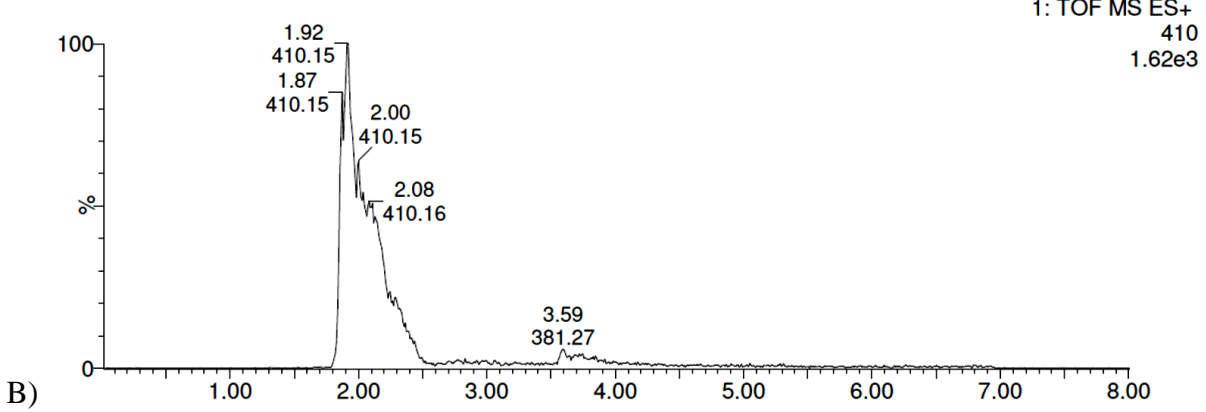

BorDH2 assay

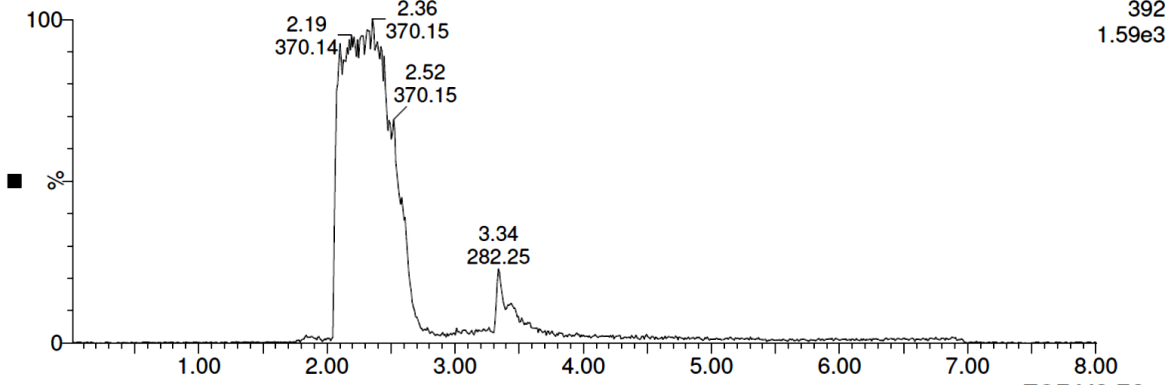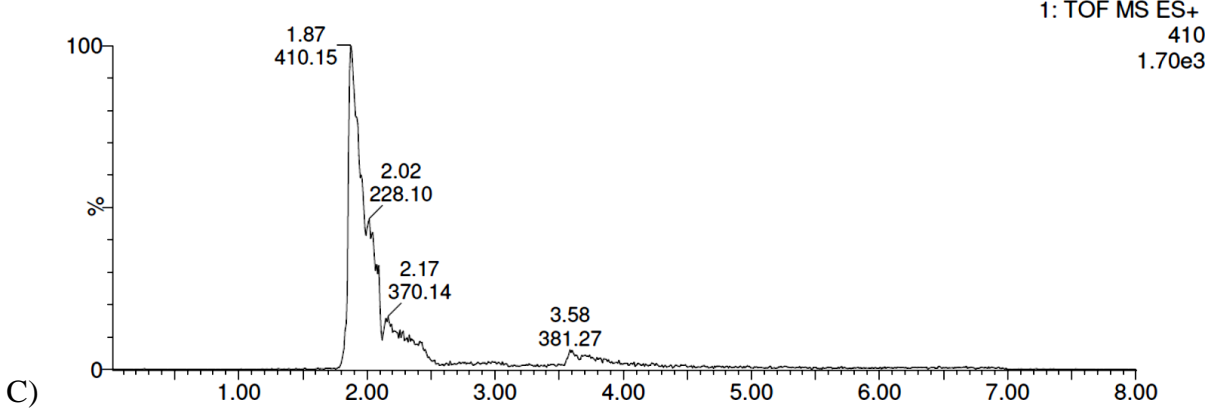

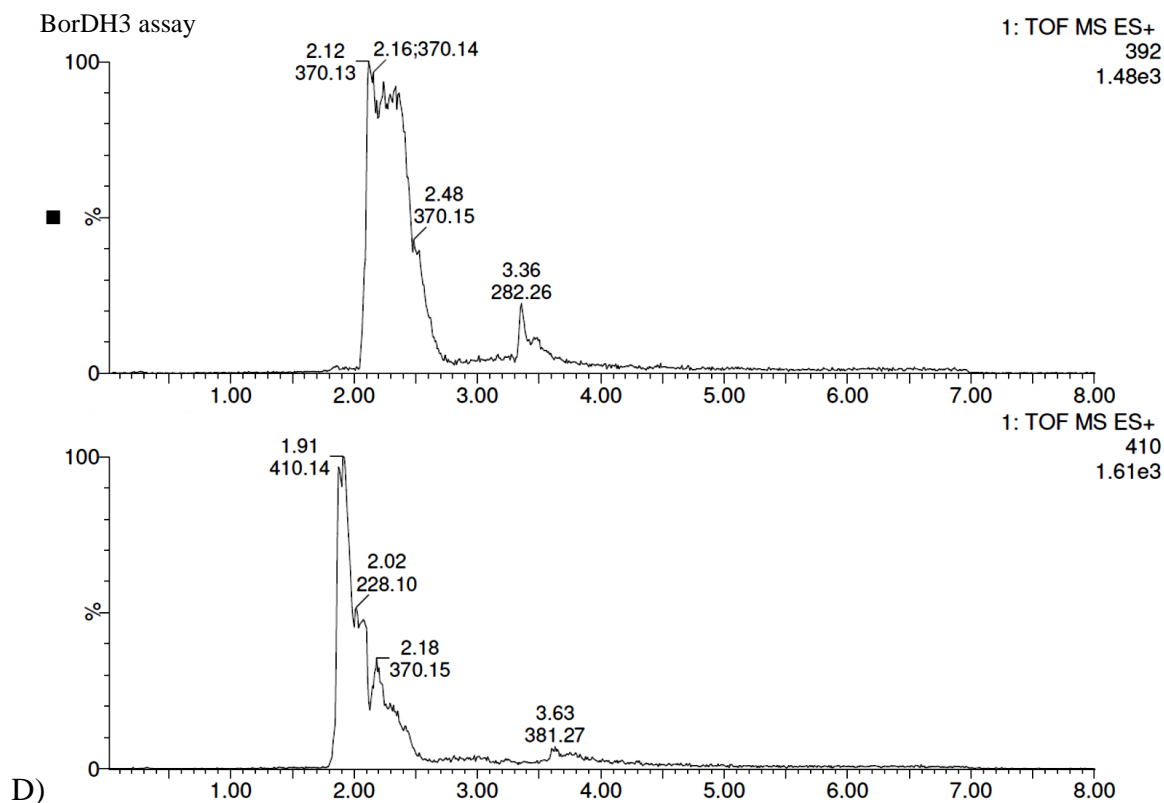

**Figure S2:** UPLC-MS analysis of the conversion assays with substrate **17a/b**. a) Enzyme-free overnight incubation of **17a/b**; b) overnight incubation of **17a/b** with BorDH3-H49A; c) overnight incubation of **17a/b** with BorDH2; d) overnight incubation of **17a/b** with BorDH3;  $[M+Na]^+$  (**17a/b**) = 410,  $[M+Na]^+$  (**18**) = 392; x-axis: retention time, y-axis: relative intensity.

## Product derivatization and configuration analysis

For determination of the product configuration, the assay products were transformed into the corresponding *bis*-methylesters. Therefore, the crude mixtures were treated with 50  $\mu$ L of 0.5 M NaOH in 50  $\mu$ L THF and 50  $\mu$ L H<sub>2</sub>O for 30 min. After acidification with 2 M HCl to pH 6, the solvent was removed under reduced pressure. Methylation occurred by treatment with 20  $\mu$ L of trimethylsilyldiazomethane (10% in hexane) in methanol/toluene for 15 min. The derivatization products were compared to synthetic standards by UPLC-MS.

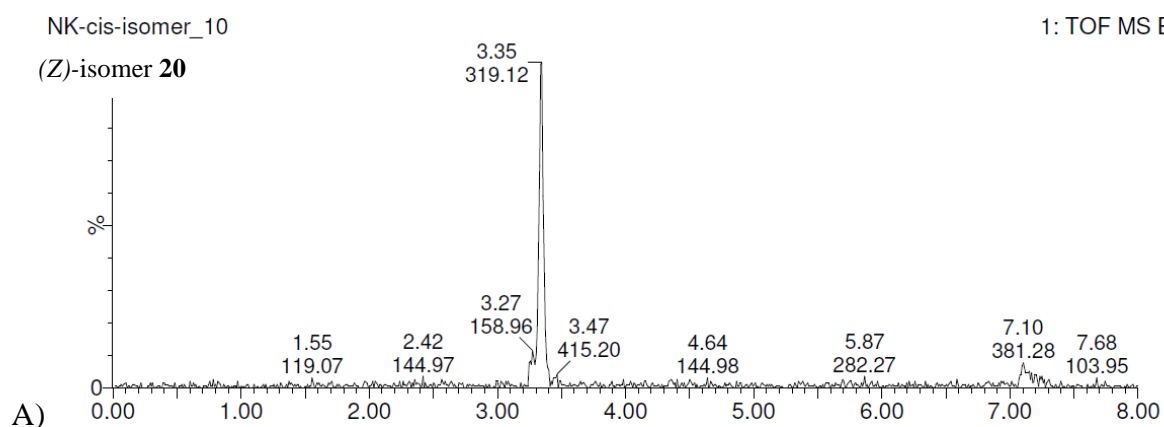

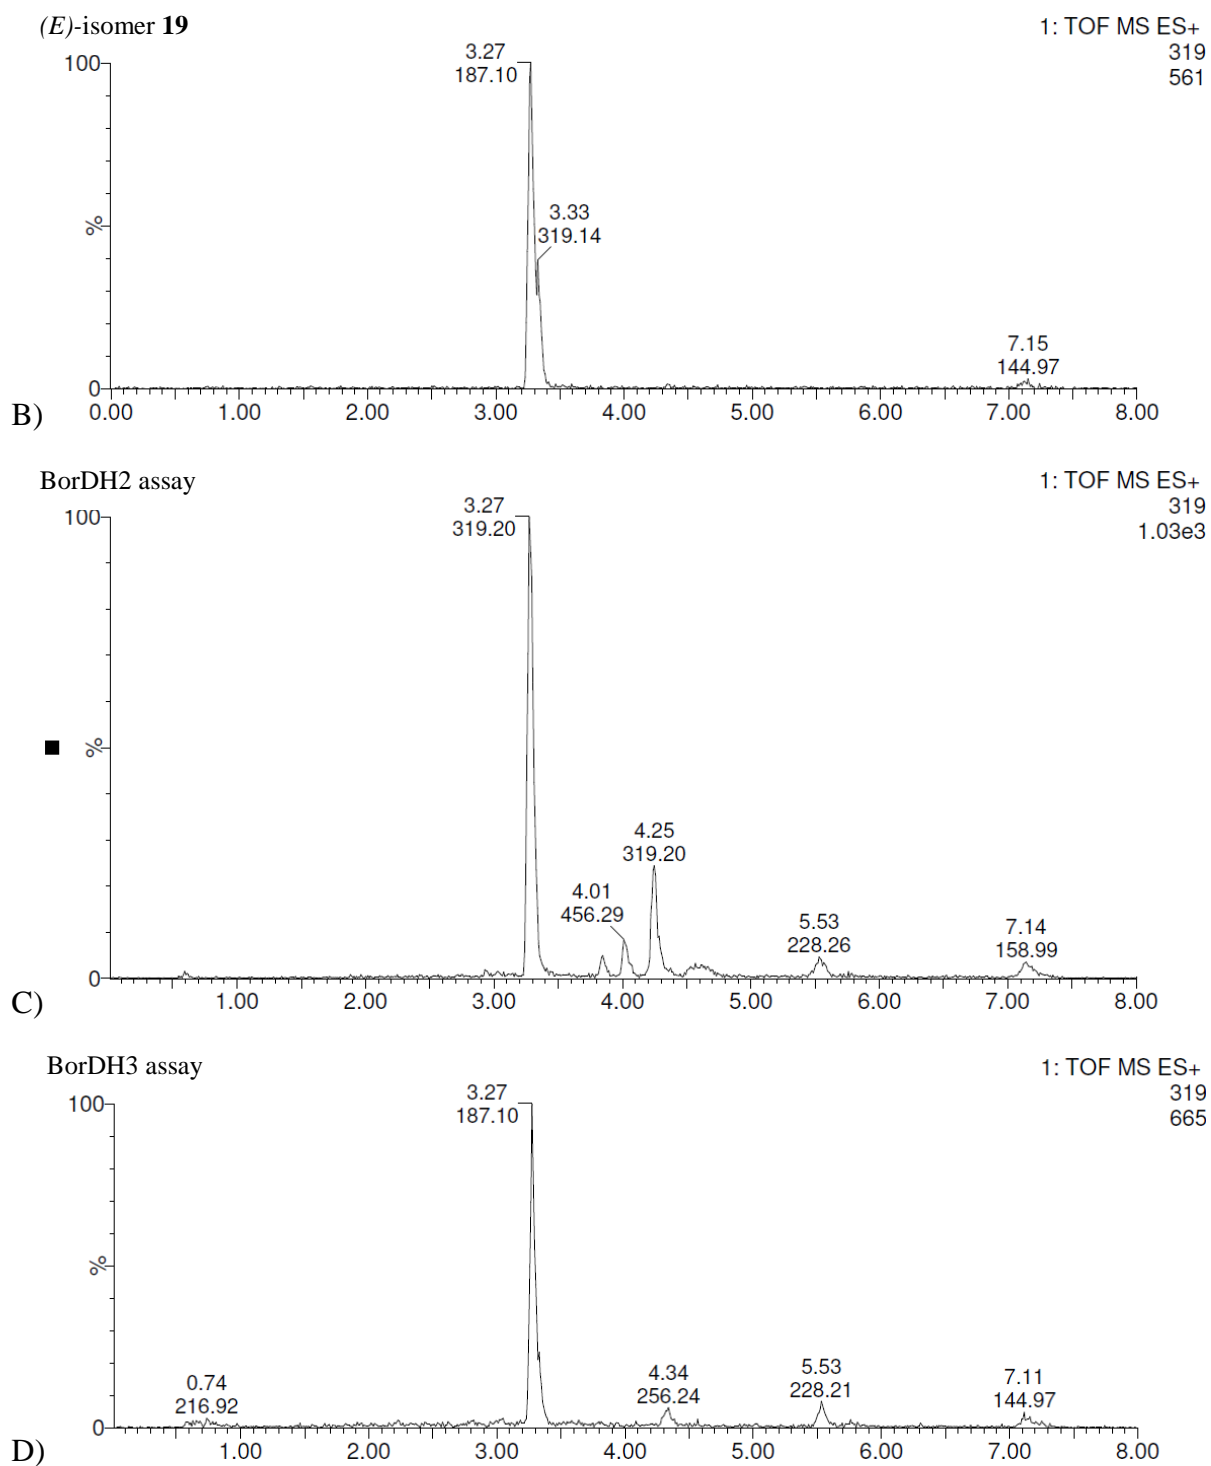

**Figure S3:** UPLC-MS analysis of derivatized assay products and comparison to reference molecules. A) *(Z)*-isomer, reference *bis*-methylene ester **20**; B) *(E)*-isomer, reference *bis*-methylene ester **19**; C) derivatized dehydration product of BorDH2; D) derivatized dehydration product of BorDH3;  $[M+Na]^+$  (**19/20**) = 319; x-axis: retention time, y-axis: relative intensity.



BorDH2 spiked with (*Z*)-isomer

1: TOF MS ES+  
319  
1.61e3

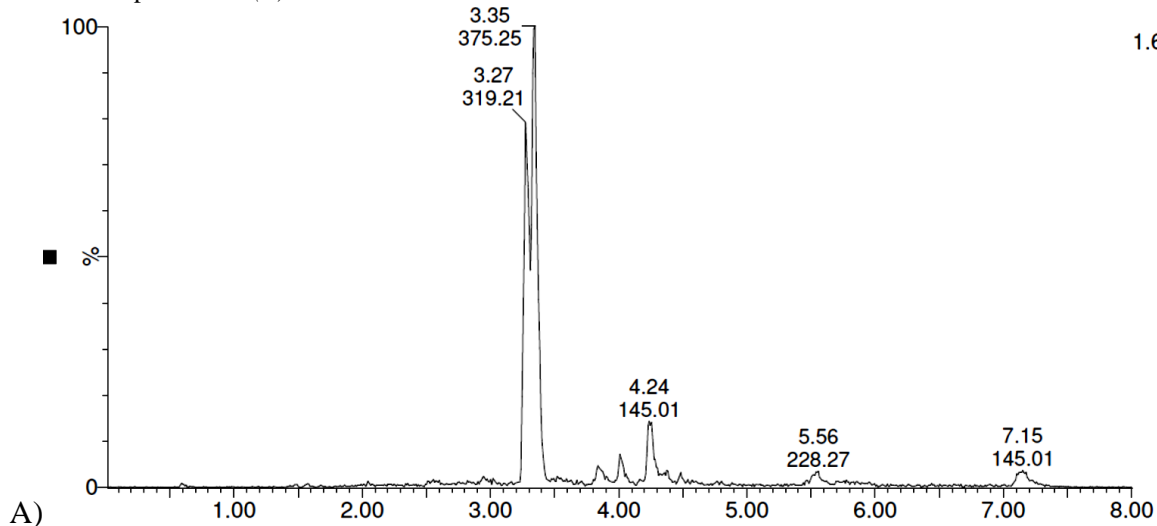

BorDH2 spiked with (*E*)-isomer

1: TOF MS ES+  
319  
2.82e3

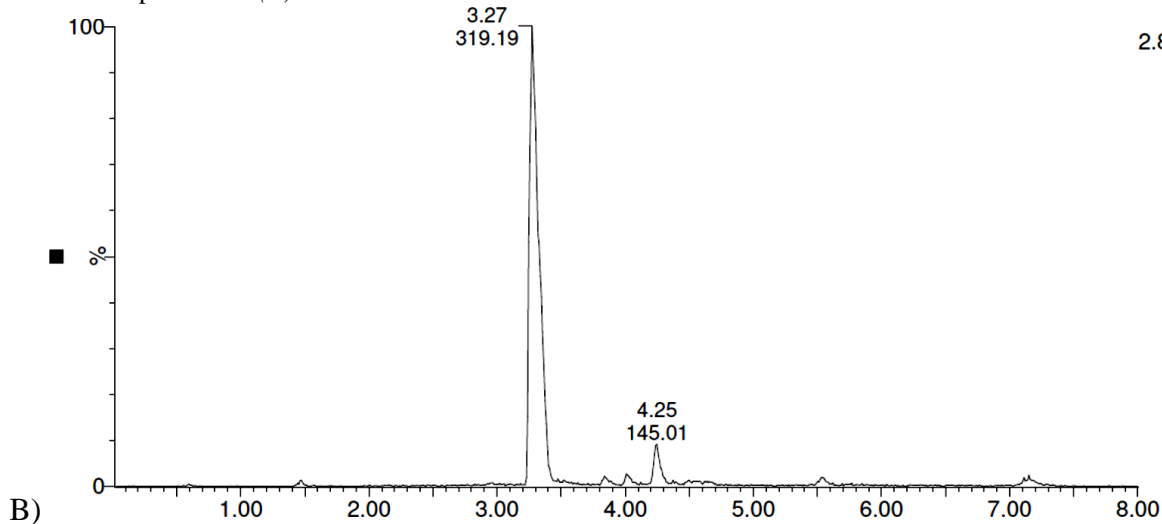

BorDH3 spiked with (*Z*)-isomer

1: TOF MS ES+  
319  
728

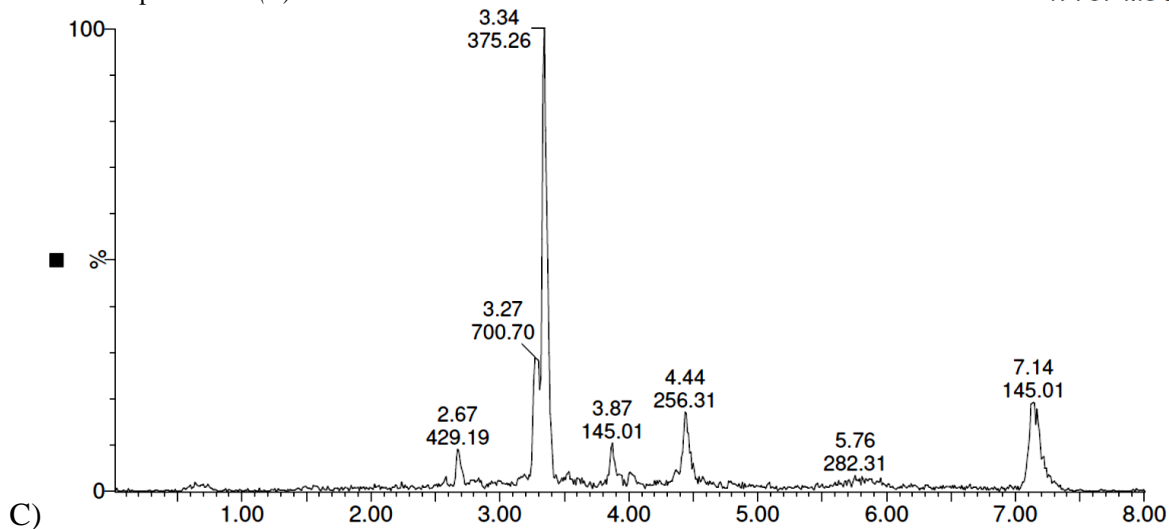

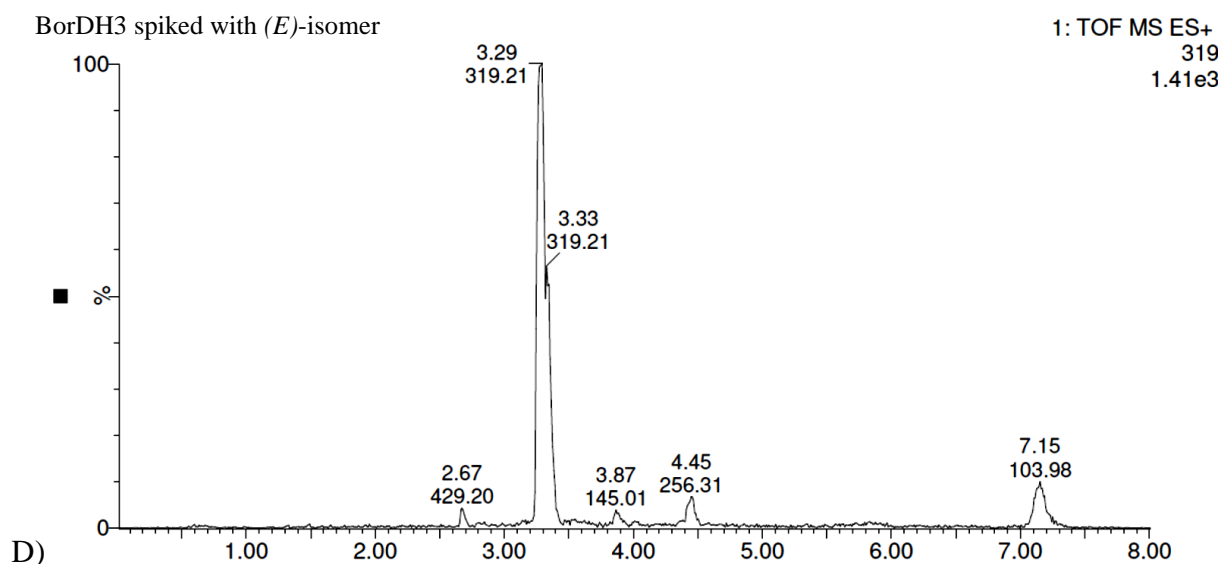

**Figure S4:** UPLC-MS runs of derivatized assay products, which were spiked with the respective isomers **19** or **20** before analysis. A) BorDH2 assayed with **17a/b**, spiked with **20**; B) BorDH2 assayed with **17a/b**, spiked with **19**; C) BorDH3 assayed with **17a/b**, spiked with **20**; D) BorDH3 assayed with **17a/b**, spiked with **19**;  $[M+Na]^+$  (**19/20**) = 319; x-axis: retention time, y-axis: relative intensity.

### NMR analysis of the large-scale BorDH3 assay

10 mg **17a/b** were incubated with 6 mg/mL BorDH3 in 25 mM HEPES (pH7.5, 100 mM NaCl) at 37 °C for 16 h (end volume 1 mL). The sample was 3 times extracted with EtOAc and the solvent was removed *in vacuo*. The sample was dissolved in  $CD_2Cl_2$  and the resulting NMR spectrum was compared to the spectrum of synthetic **18**. The chemical shifts of the olefinic protons H3, H4 and H5 correlate to (*2E,4E*)-configuration of the diene (Figure S5).

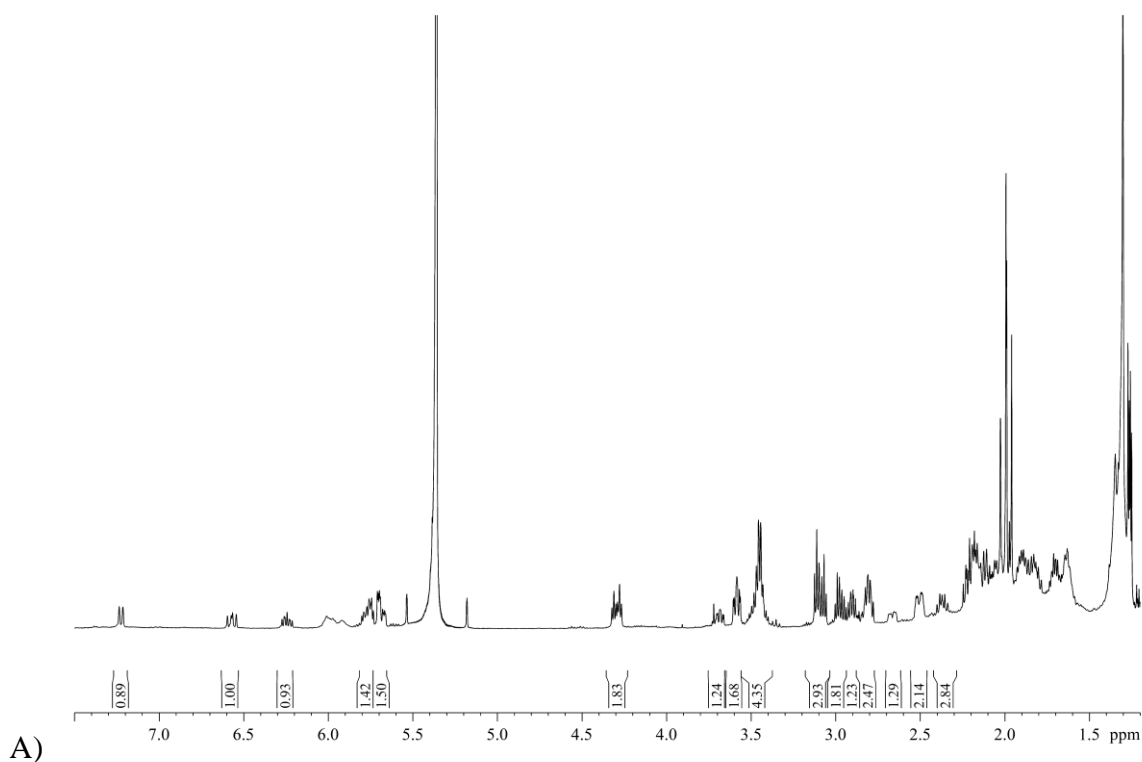

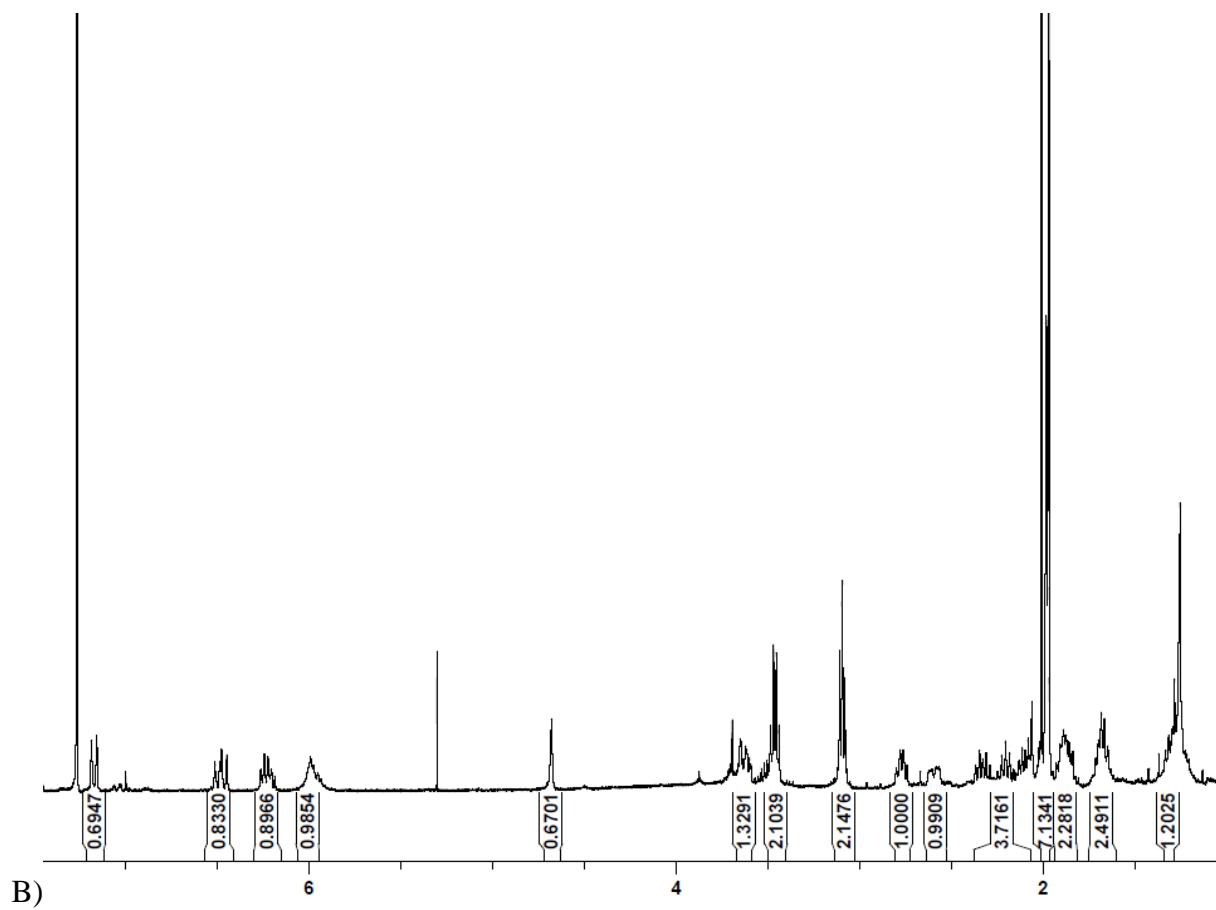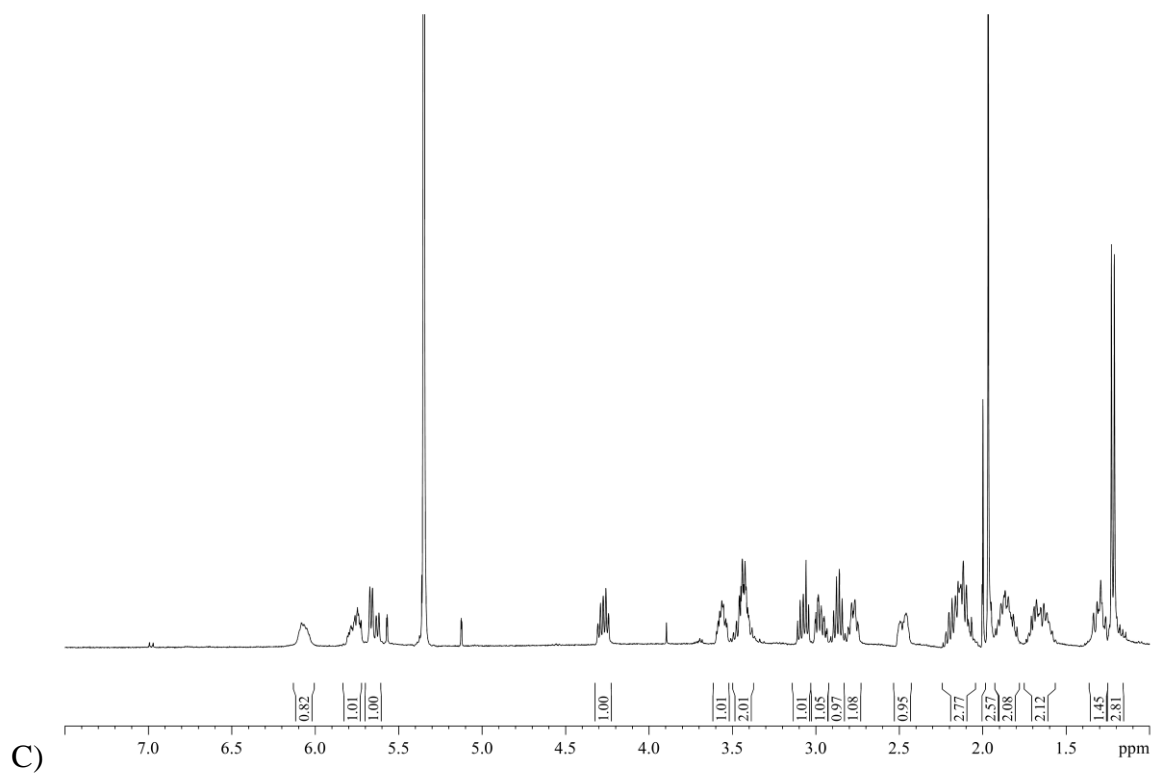

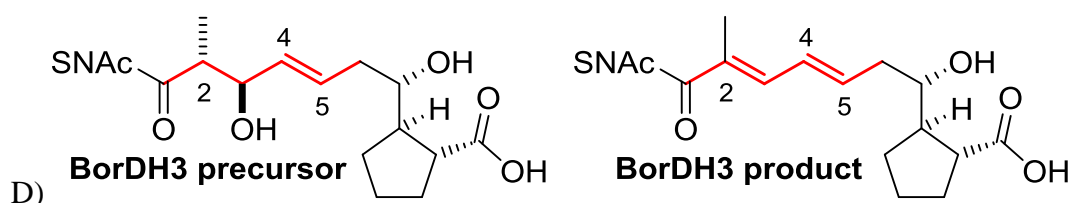

**Figure S5:** A)  $^1\text{H}$  NMR spectrum of an incubation of **17a/b** with BorDH3 ( $\text{CD}_2\text{Cl}_2$ , 500 MHz). B)  $^1\text{H}$  NMR spectrum of synthetic **18** ( $\text{CDCl}_3$ , 400 MHz); C)  $^1\text{H}$  NMR spectrum of synthetic **17a/b** ( $\text{CD}_2\text{Cl}_2$ , 400 MHz); D) Structures of the BorDH3 precursor and the BorDH3 product.

## NMR analysis of pre-borrelidin

Pre-borrelidin was isolated from the mutant strain M19B911 as previously described.<sup>[3]</sup> The previous NMR assignments for pre-borrelidin were confirmed using  $^1\text{H}$ ,  $^{13}\text{C}$ , DEPT, COSY, HSQC and HMBC experiments. The observed  $^3J$  coupling constants are consistent with either of the (12*Z*,14*E*) or (12*E*,14*E*)-configurations as shown in Figure S6.

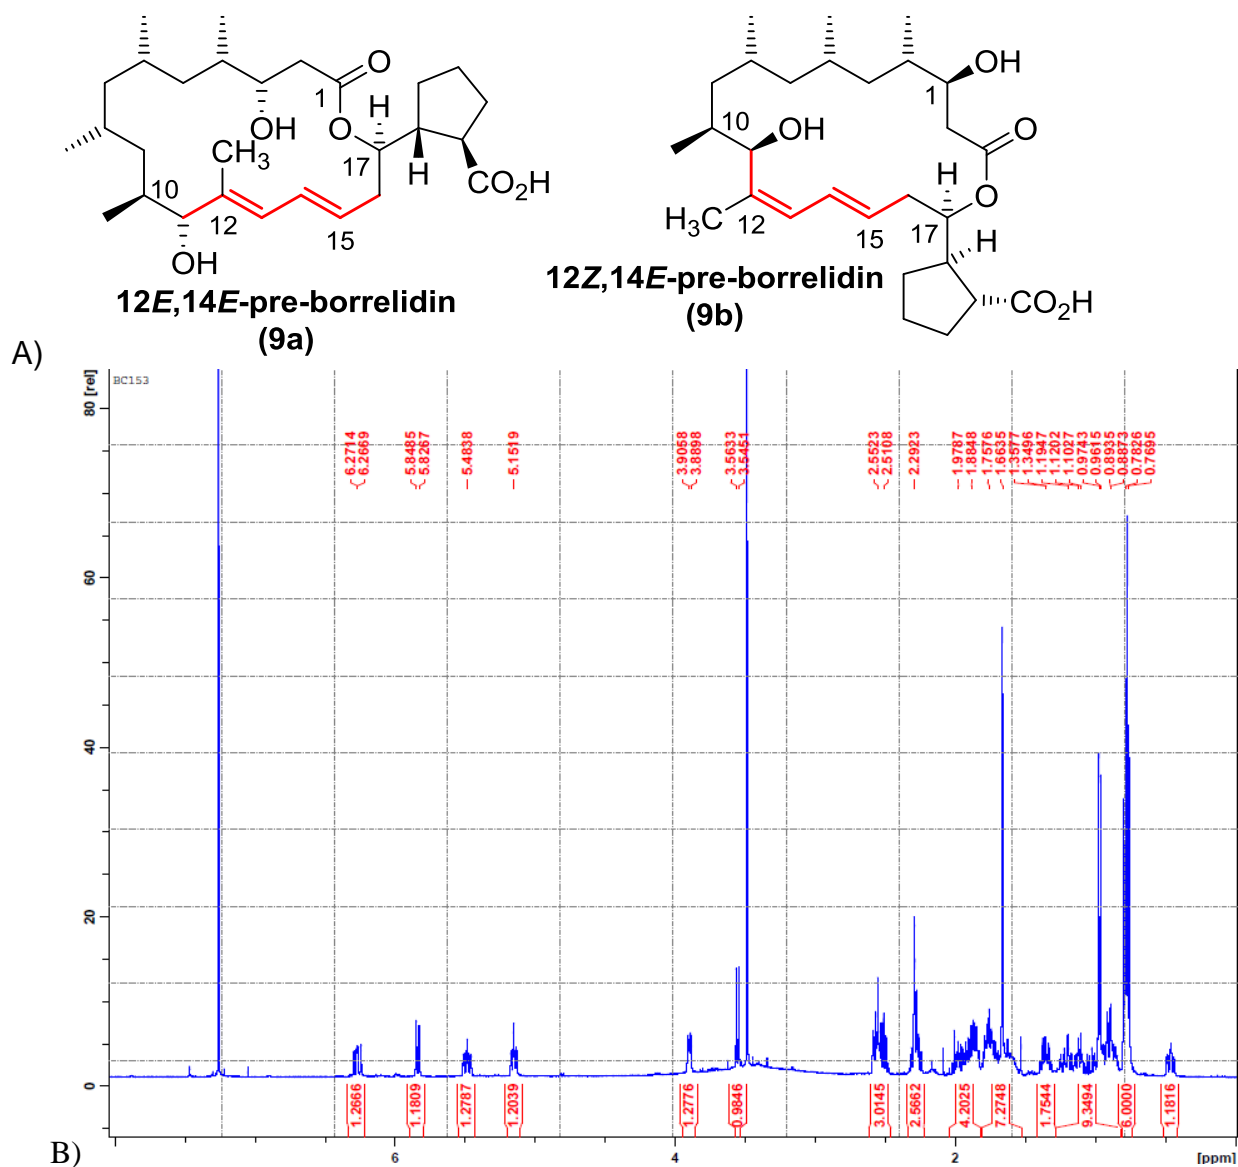

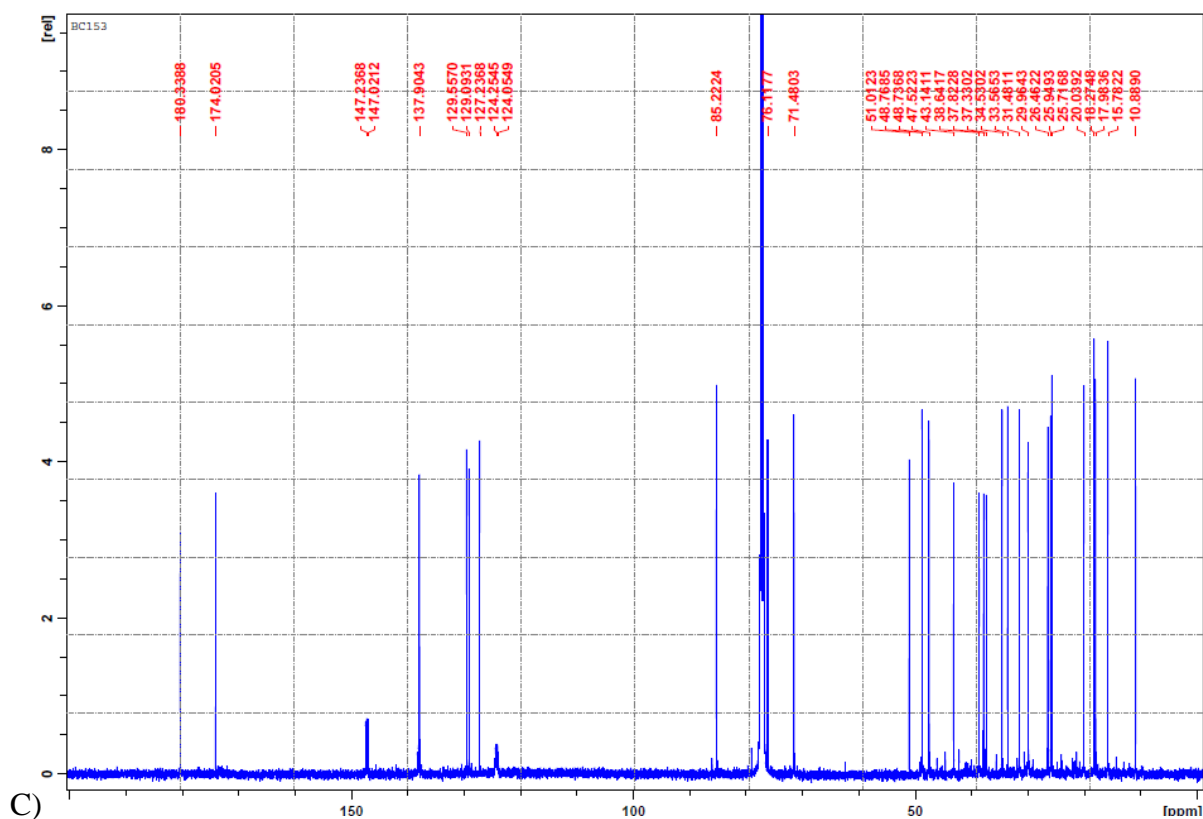

**Figure S6:** A) Structures of the potential configurational isomers of pre-borrelidin; B)  $^1\text{H}$  NMR spectrum of pre-borrelidin **9a** ( $\text{CDCl}_3$ , 500 MHz); C)  $^{13}\text{C}$  NMR spectrum of pre-borrelidin **9a** ( $\text{CDCl}_3$ , 125 MHz).

To determine the configuration of the C12-C13 double bond a NOESY experiment was performed and the data are summarised in Table S1 and Figure S7. In accordance with a 12*E* configuration, a strong correlation for the methyl group attached to C12 to both H14 and H11 is visible. In contrast there is no correlation between the methyl group attached to C12 and H13, which would be expected for 12*Z*.

**Table S1:**  $^1\text{H}$  NMR spectrum of pre-borrelidin and listing of selected NMR data for pre-borrelidin ( $\text{CDCl}_3$ , 500 MHz).

| Position          | Chemical shift (ppm) | J (Hz)                | NOESY correlations                                 |
|-------------------|----------------------|-----------------------|----------------------------------------------------|
| H10               | 1.60                 | m                     | 10- $\text{CH}_3$                                  |
| H11               | 3.53                 | 9 (d)                 | H13, 10- $\text{CH}_3$ , 12- $\text{CH}_3$         |
| H12               | -                    | -                     | -                                                  |
| H13               | 5.84                 | 11.0 (d)              | H11, H14(w), H15                                   |
| H14               | 6.28                 | 1.8, 11.0, 14.9 (ddd) | H13(w), H16a, 12- $\text{CH}_3$                    |
| H15               | 5.48                 | 3.5, 10.7, 14.9 (ddd) | H13, H16b, H17                                     |
| H16a              | 2.22                 | m                     | H14, H16b                                          |
| H16b              | 2.53                 |                       | H15, H16a, H17                                     |
| H17               | 5.10                 | 2.9, 8.0, 11.3 (ddd)  | H15, H16b, H19                                     |
| 10- $\text{CH}_3$ | 0.94                 | 6.5 (d)               | H9, H10, H11, 8- $\text{CH}_3$ , 12- $\text{CH}_3$ |
| 12- $\text{CH}_3$ | 1.64                 | s                     | H11, H14, 10- $\text{CH}_3$                        |

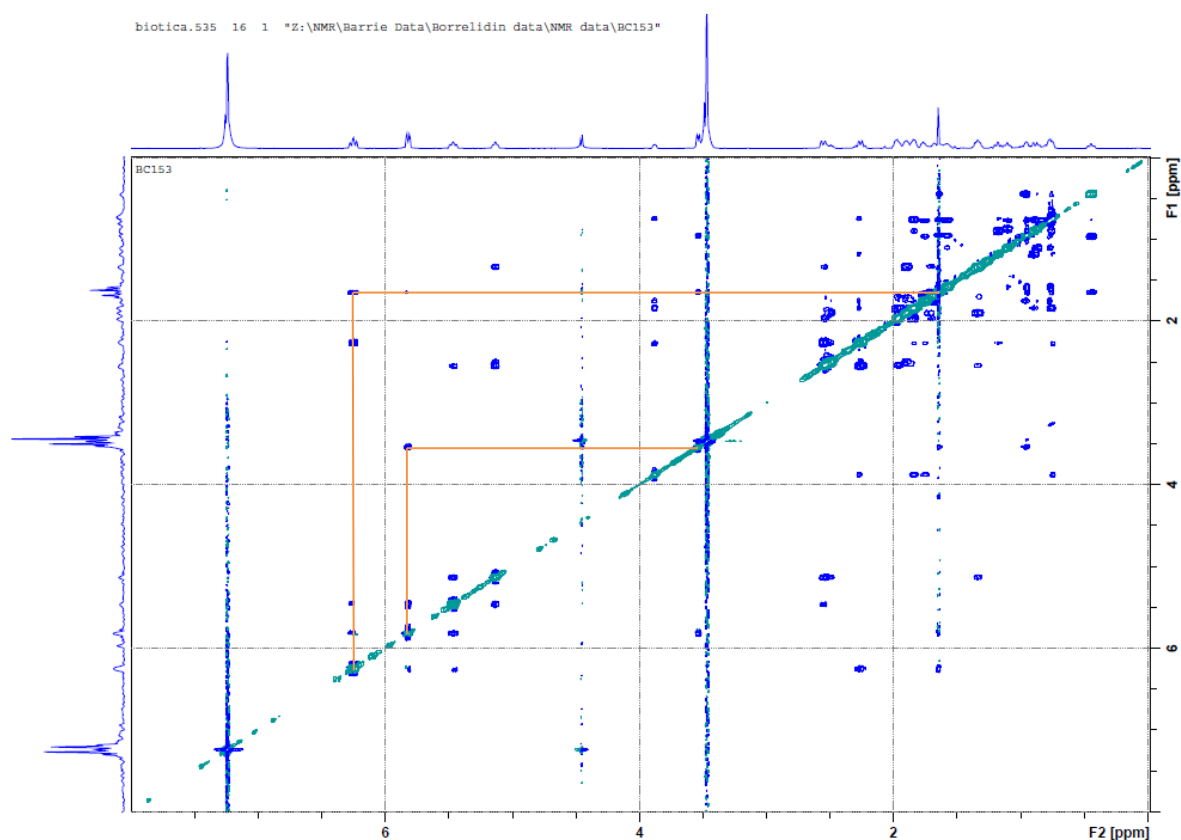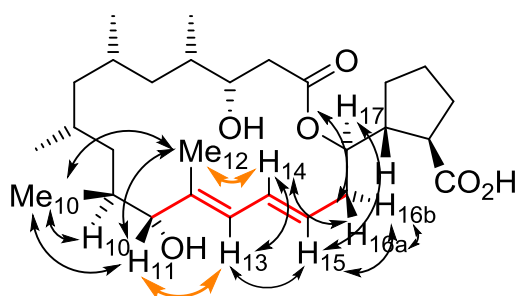

**Figure S7:** NOESY spectrum and correlations of pre-borrelidin ( $\text{CDCl}_3$ , 500 MHz). The correlations between 12- $\text{CH}_3$  and H14 as well as between H11 and H13 are highlighted in orange.

In a gradient NOE irradiating at 5.84 ppm (H13) strong correlations to H11 and H15 (and very weak signal to H14) and no correlation to the 12- $\text{CH}_3$  group were observed. These combined data firmly establish the geometry of pre-borrelidin as (12*E*,14*E*).

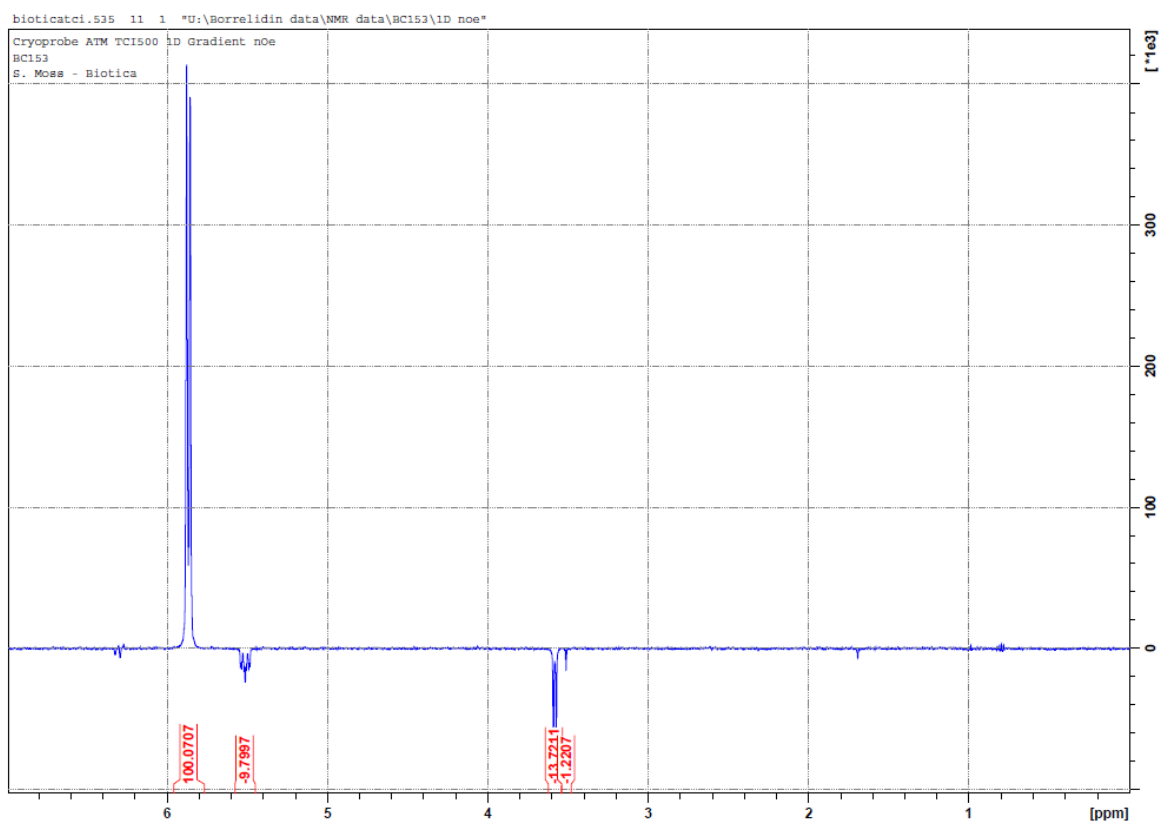

**Figure S8:** NOE correlation spectrum of pre-borrelidin (CDCl<sub>3</sub>, 500 MHz). Irradiation on proton H13 led to a correlation to protons H11 and H15, which is in agreement to a 12*E*-configuration.

## References supporting information

1. H. E. Gottlieb, V. Kotlyar, A. Nudelman, *J. Org. Chem.* **1997**, *62*, 7512.
2. O. Vergnolle, F. Hahn, A. Baerga-Ortiz, P. F. Leadlay, J. N. Andexer, *ChemBioChem* **2011**, *12*, 1011.
3. C. Olano, S. J. Moss, A. F. Braña, R. M. Sheridan, V. Math, A. J. Weston, C. Méndez, P. F. Leadlay, B. Wilkinson and J. A. Salas, *Mol. Microbiol.* **2004**, *6*, 1745.
4. F. Hahn, N. Kandziora, S. Friedrich, P. F. Leadlay, *Beilst. J. Org. Chem.* **2014**, in press.



# Uncovering the origin of *Z*-configured double bonds in polyketides: intermediate *E*-double bond formation during borrelidin biosynthesis

Nadine Kandziora, Jennifer Andexer, Steven J. Moss, Barrie Wilkinson, Peter F. Leadlay and Frank Hahn

## NMR spectra

CDCl<sub>3</sub>, 200 MHz

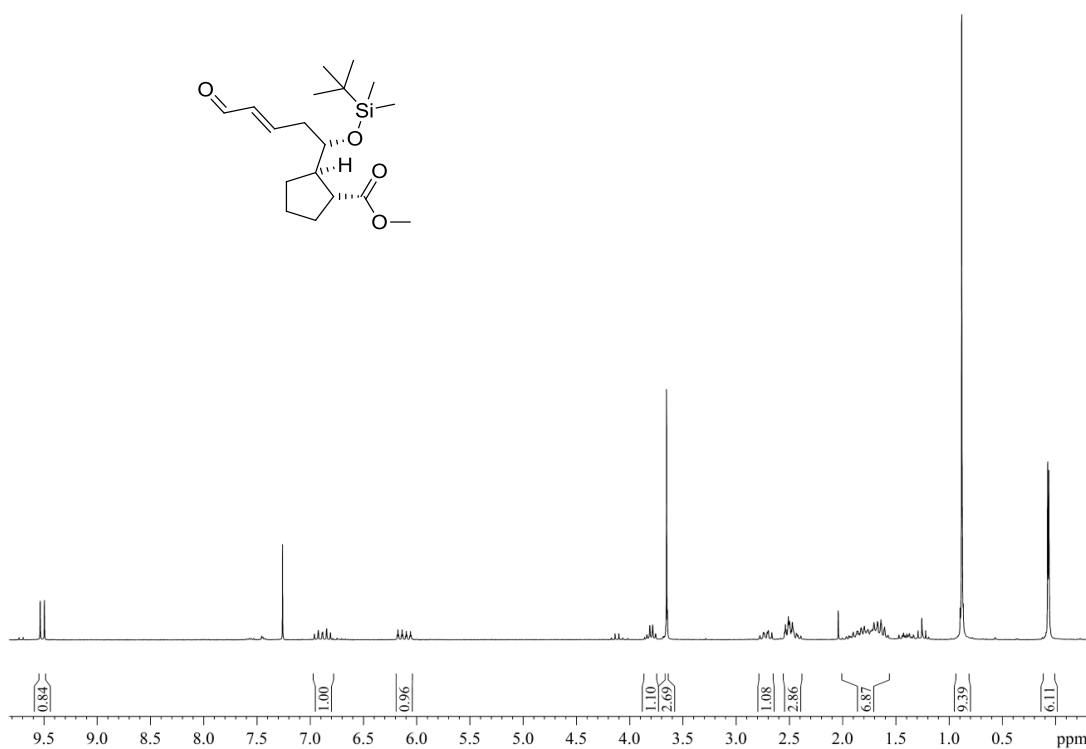

CDCl<sub>3</sub>, 400 MHz

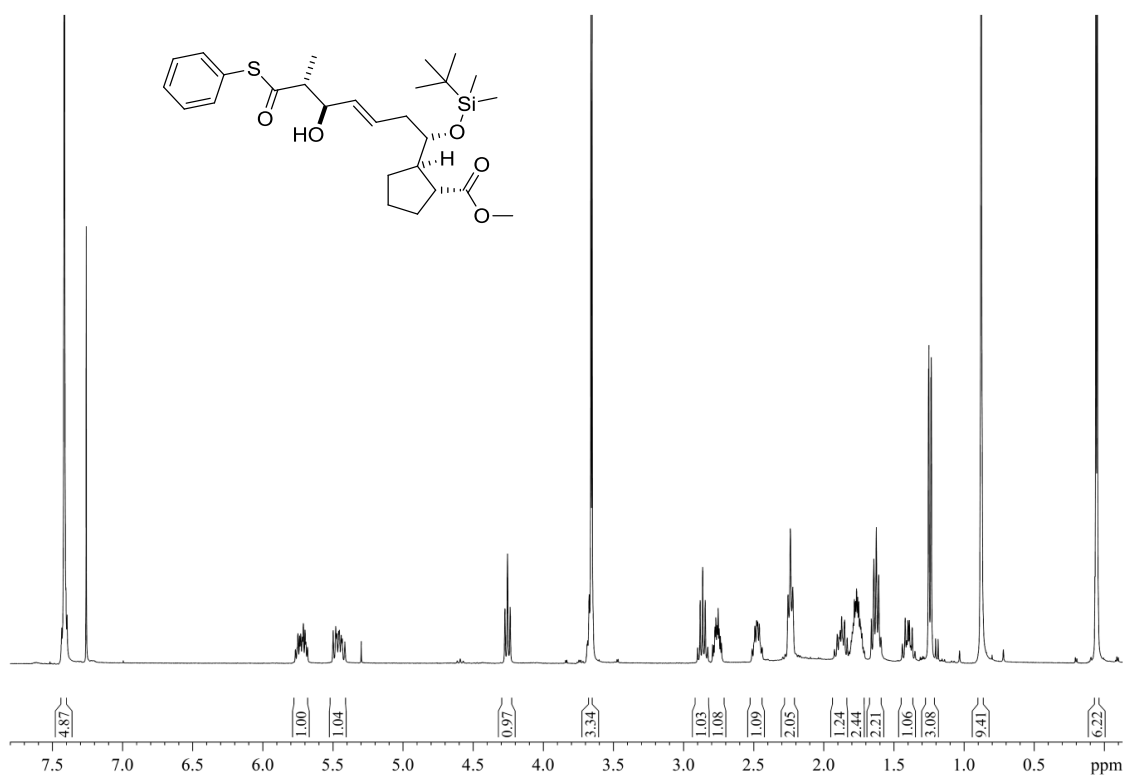

CDCl<sub>3</sub>, 100 MHz

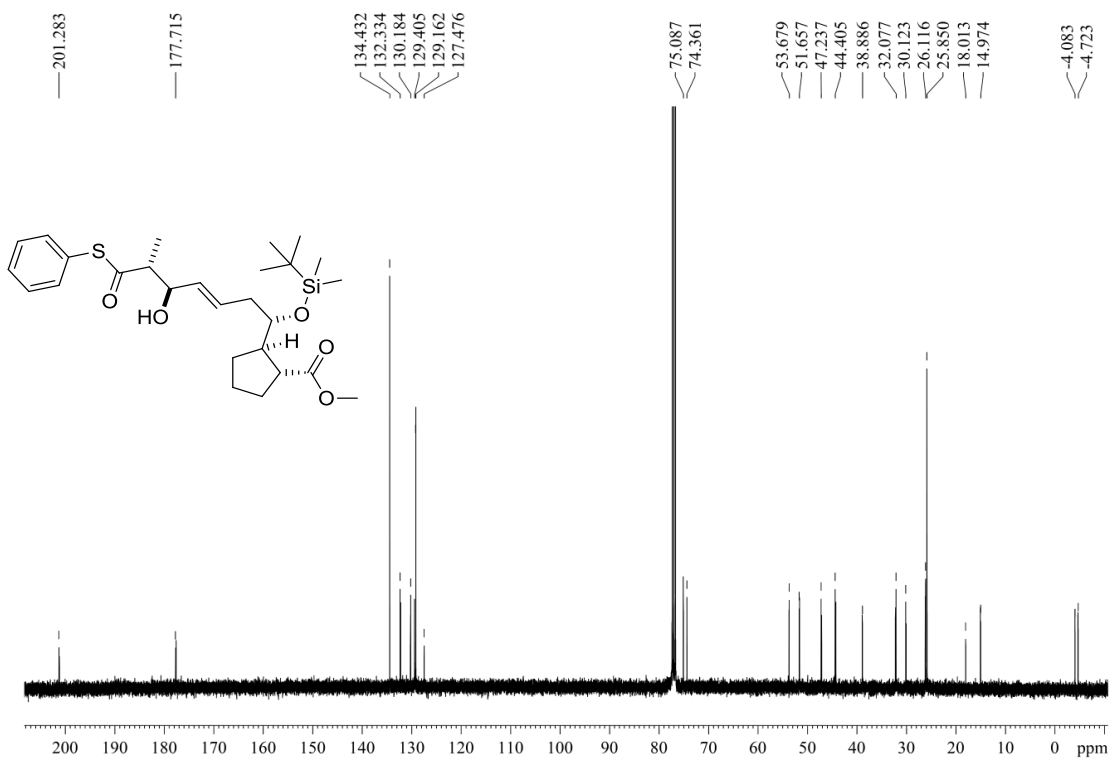

CDCl<sub>3</sub>, 500 MHz

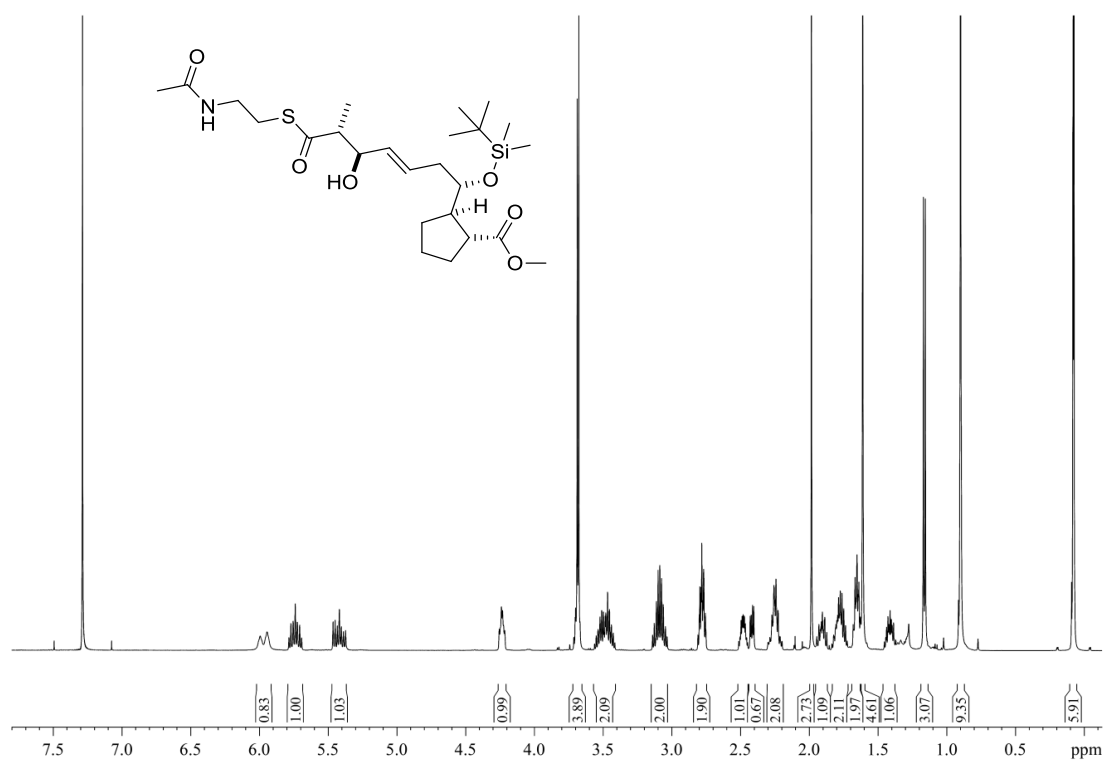

CDCl<sub>3</sub>, 125 MHz

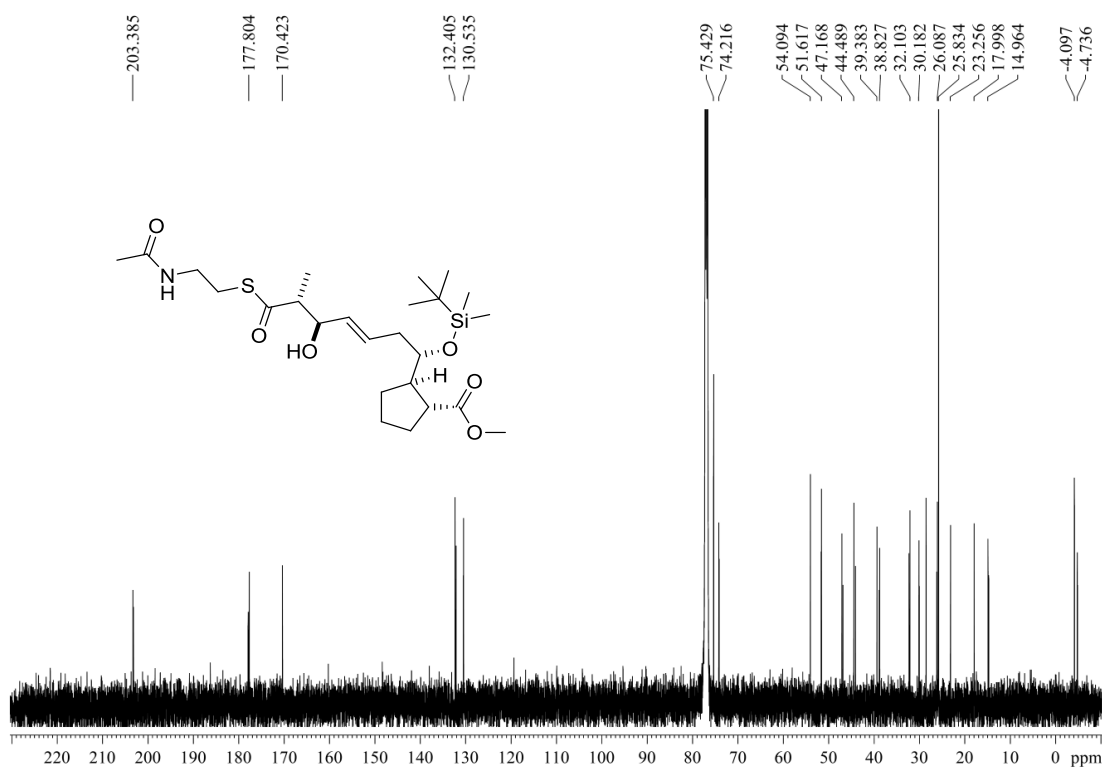

CD<sub>2</sub>Cl<sub>2</sub>, 400 MHz

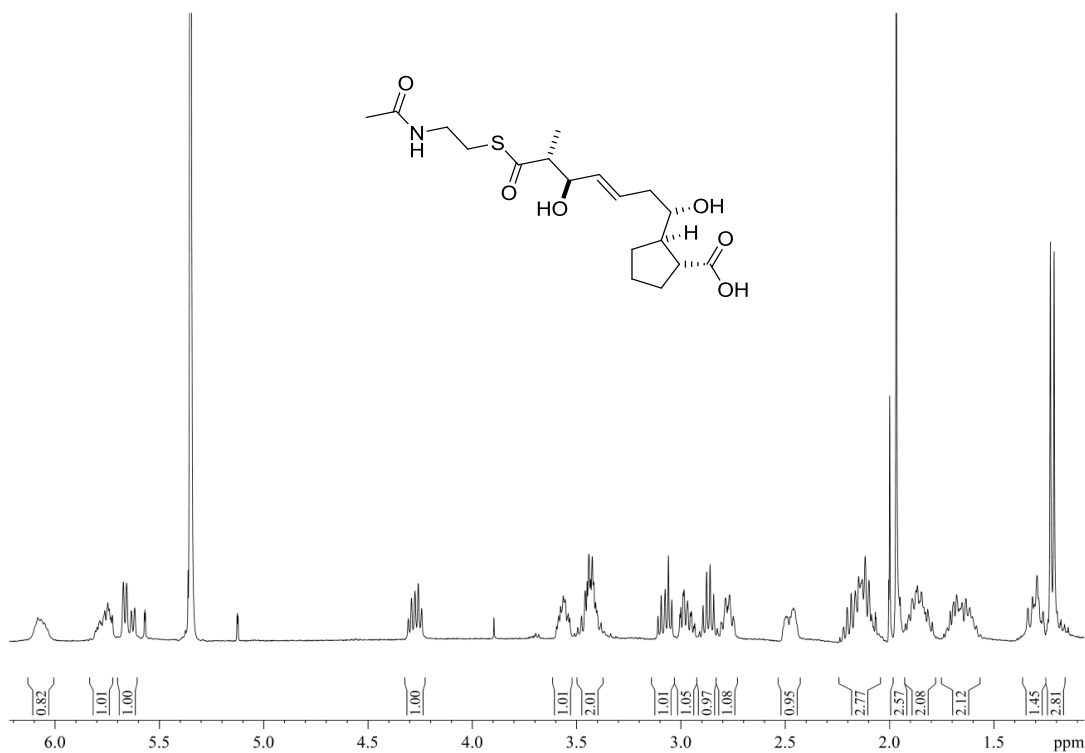

CD<sub>2</sub>Cl<sub>2</sub>, 100 MHz

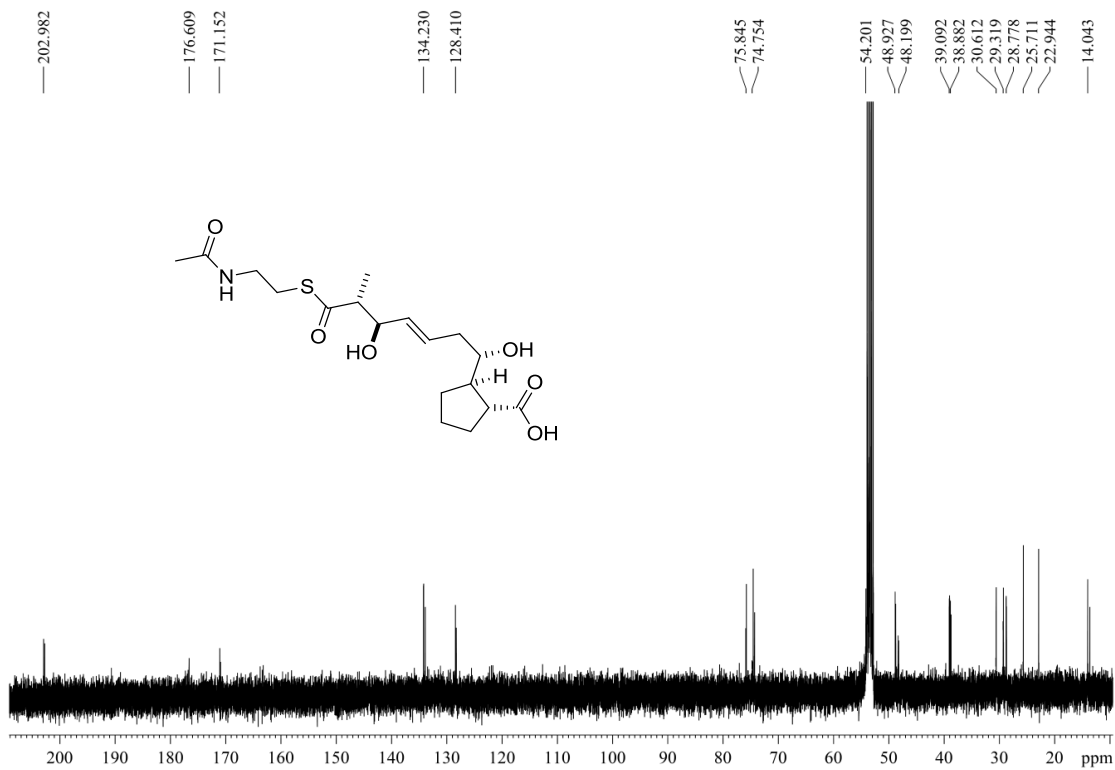

d6-benzene, 500 MHz

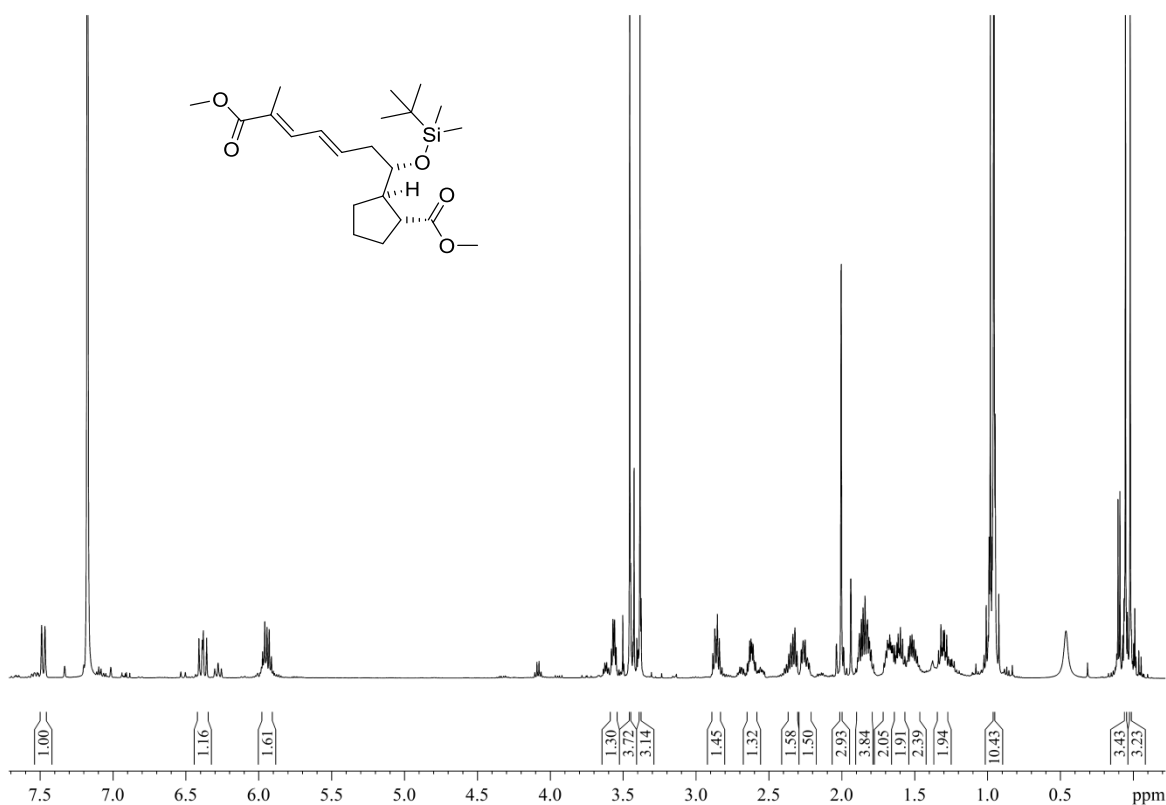

d6-benzene, 125 MHz

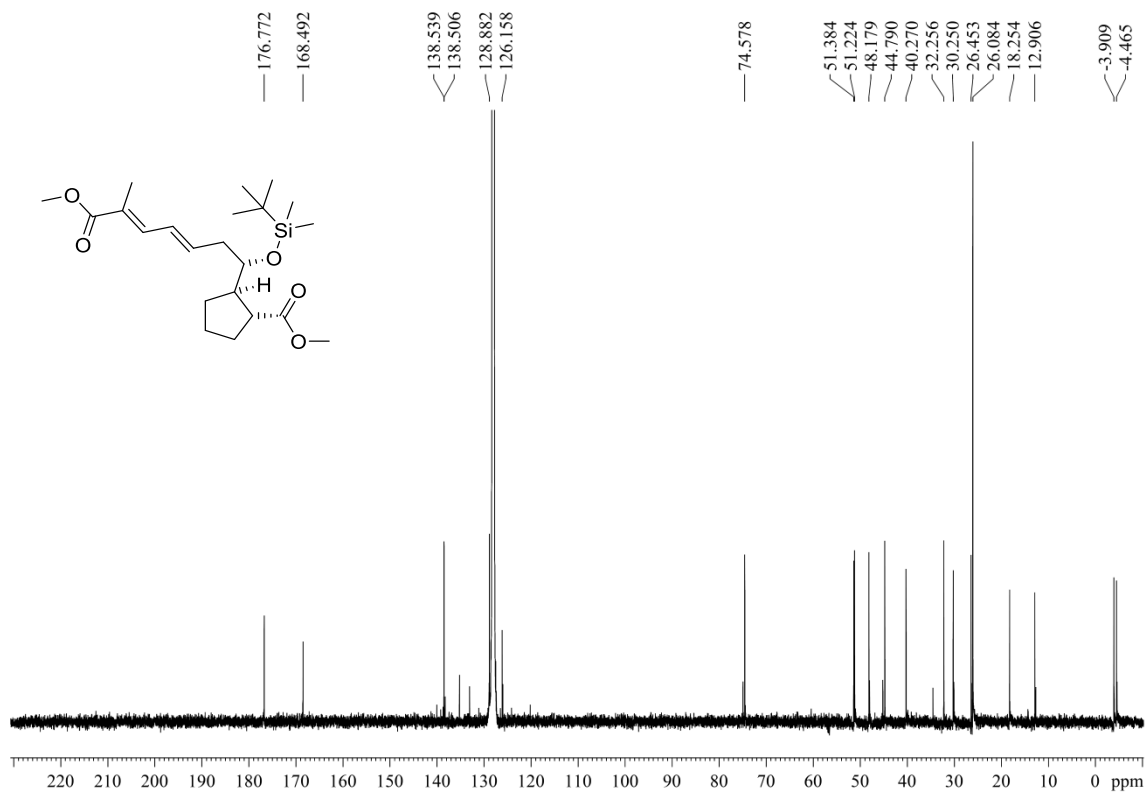

CDCl<sub>3</sub>, 400 MHz

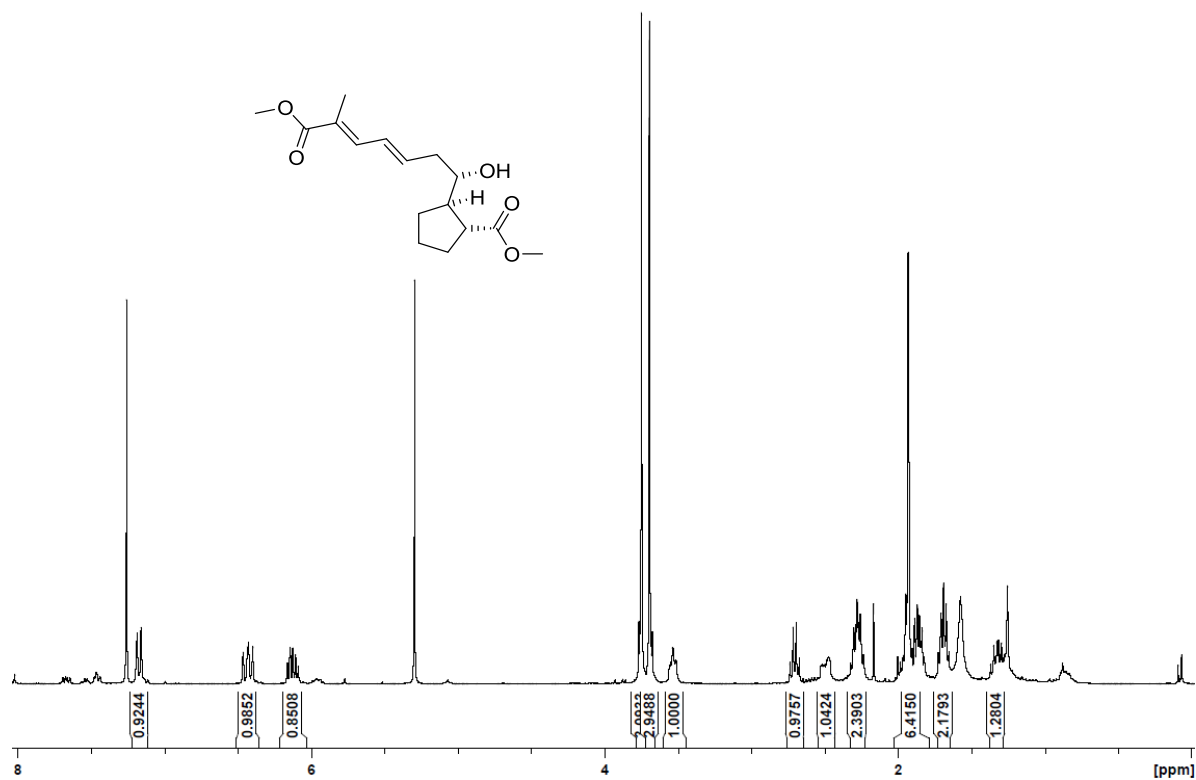

CDCl<sub>3</sub>, 100 MHz

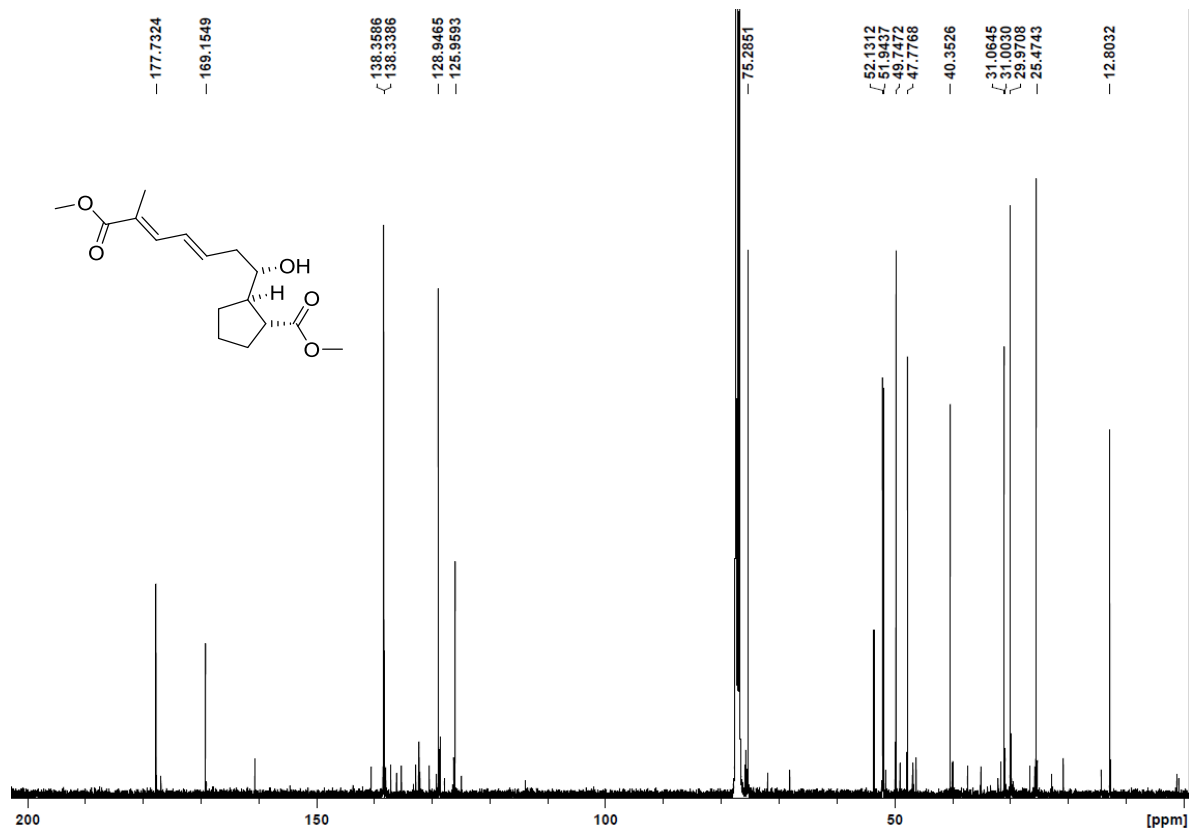

d<sub>6</sub>-benzene, 500 MHz

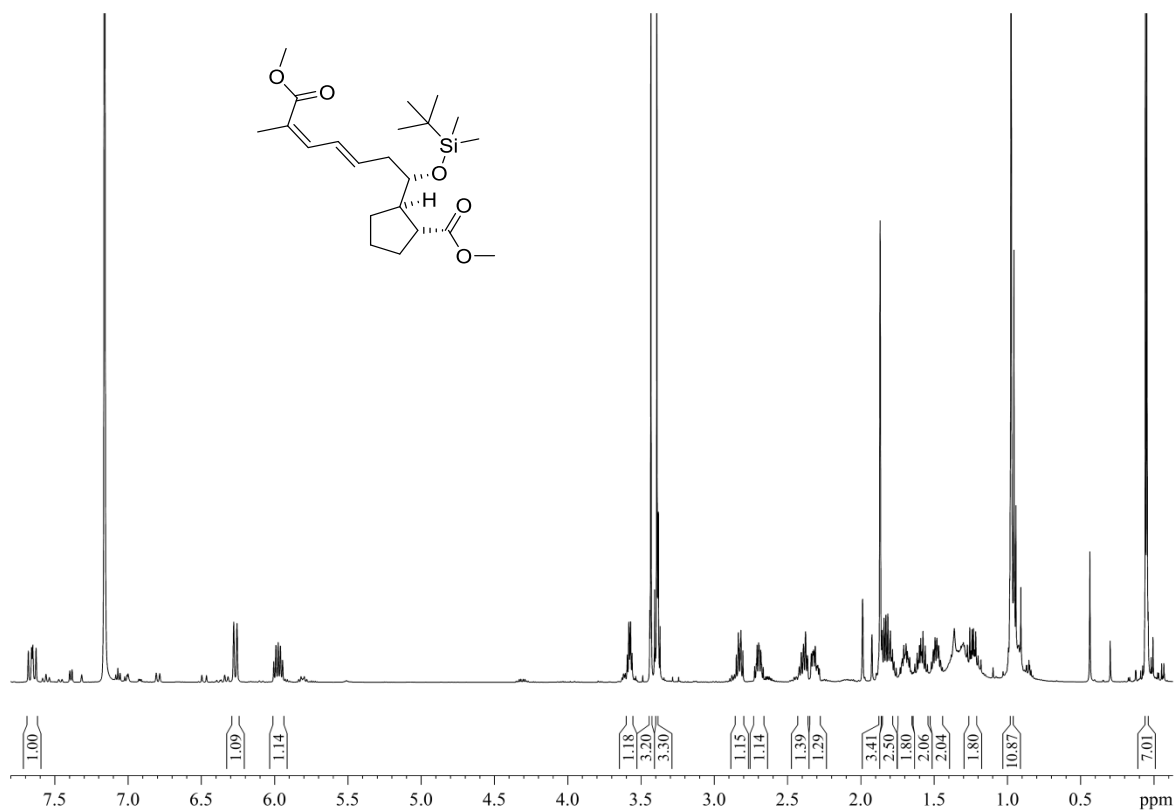

d<sub>6</sub>-benzene, 125 MHz

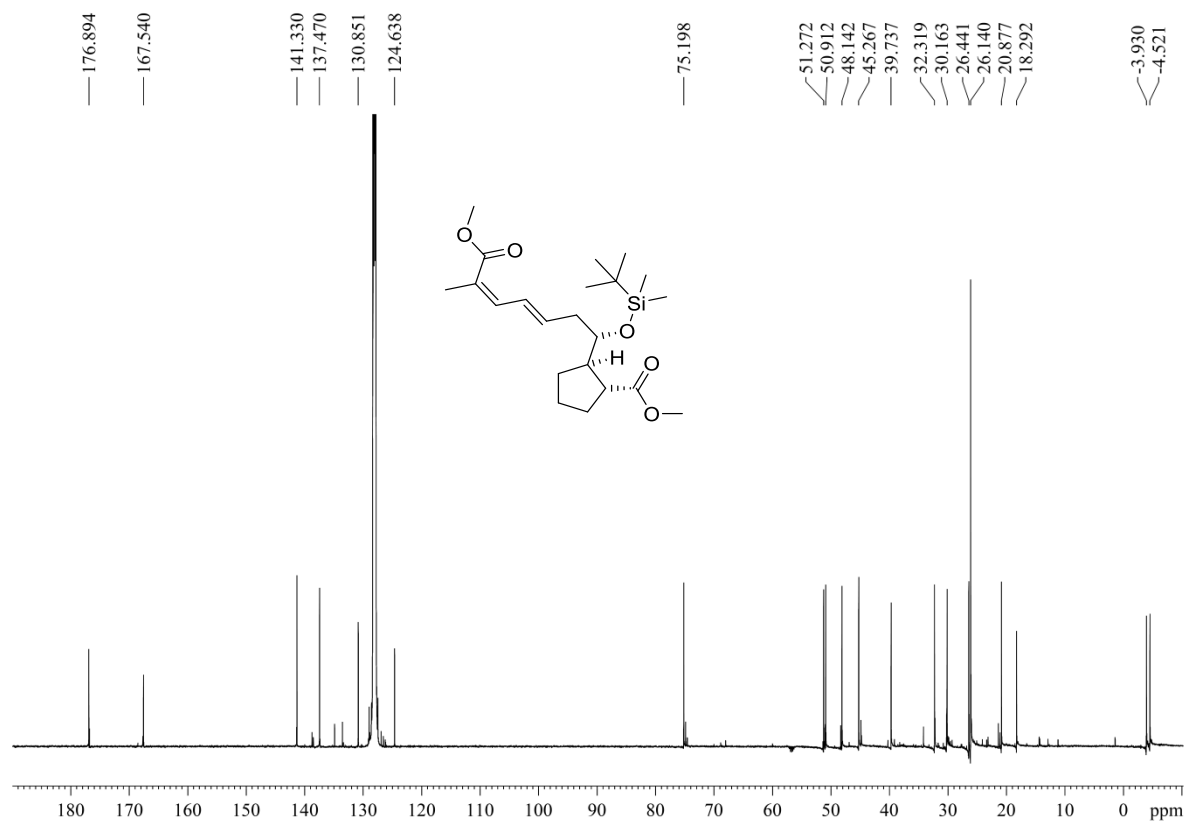

d<sub>6</sub>-benzene, 500 MHz

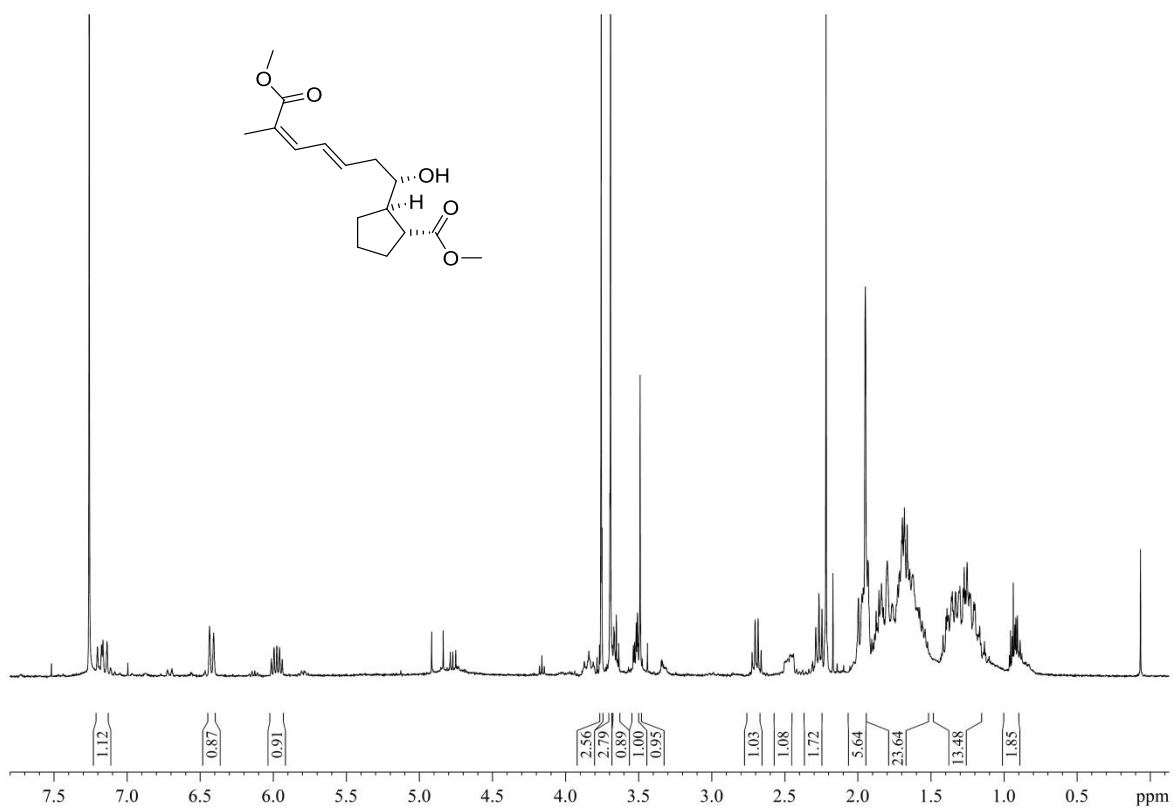



d<sub>6</sub>-acetone, 500 MHz

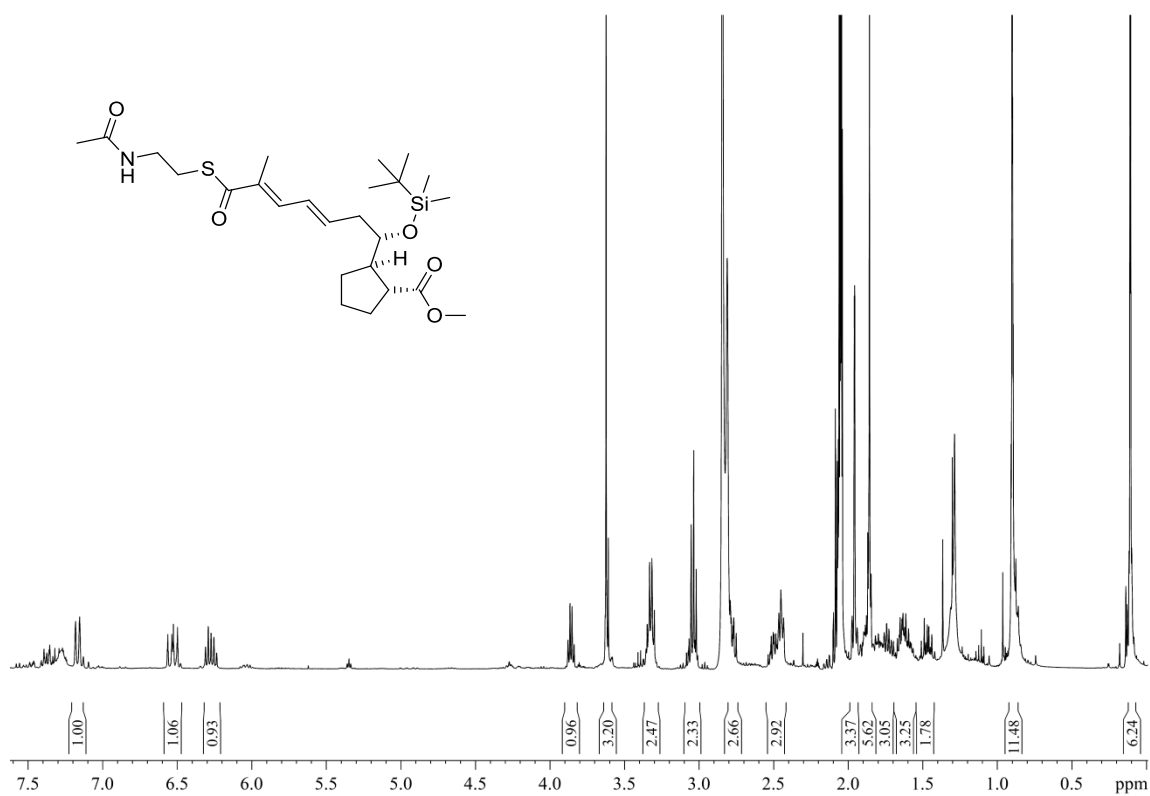

d<sub>6</sub>-acetone, 125 MHz

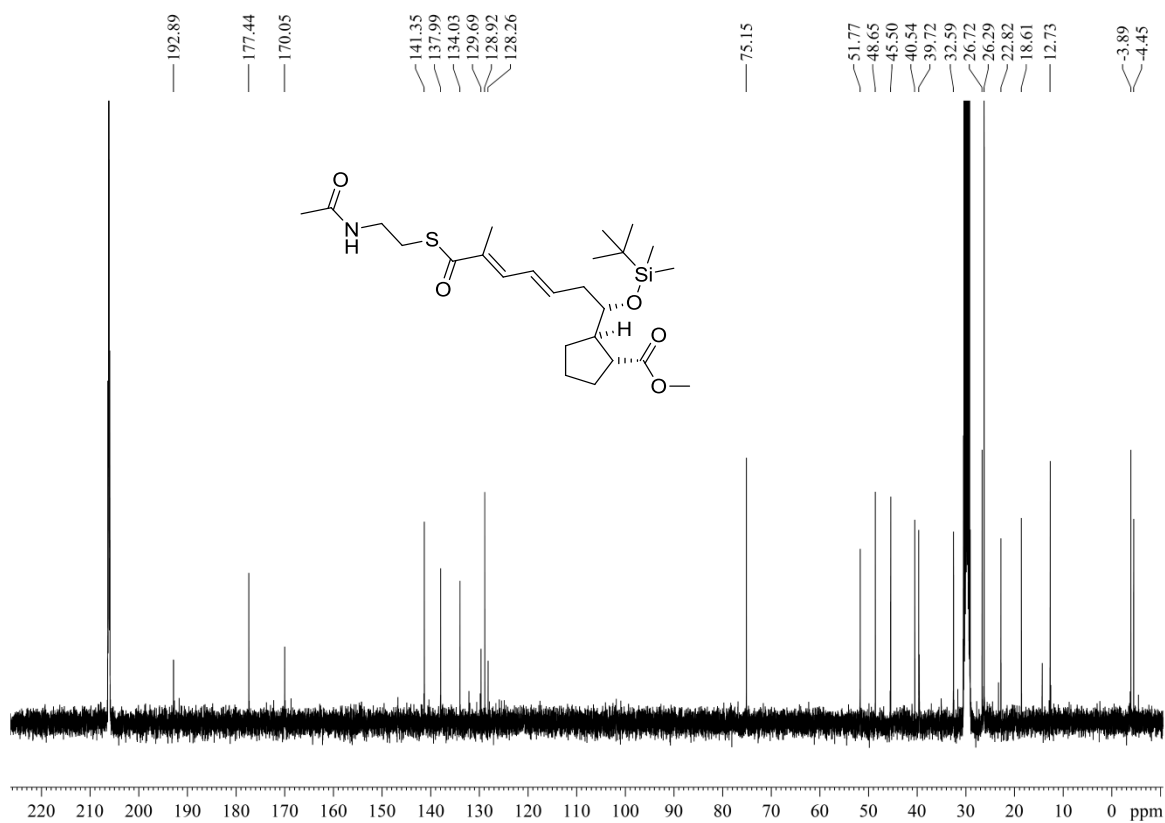

d<sub>6</sub>-acetone, 500 MHz

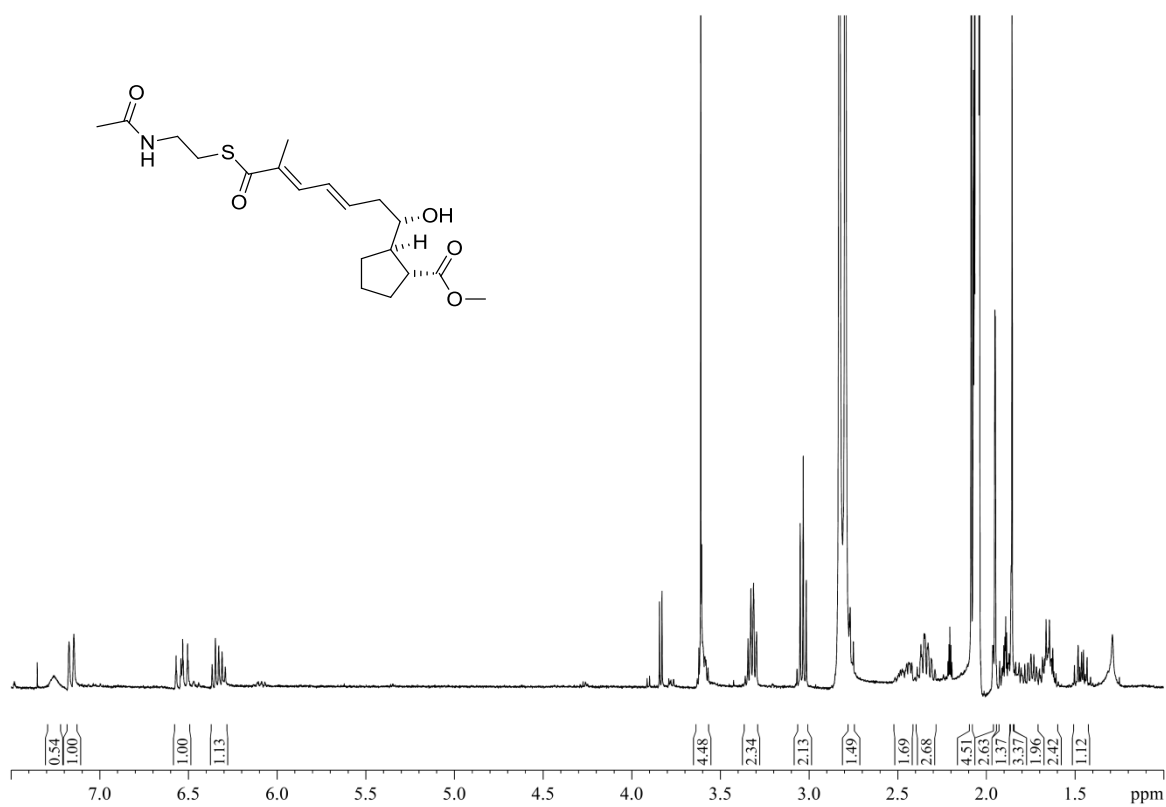

d<sub>6</sub>-acetone, 125 MHz

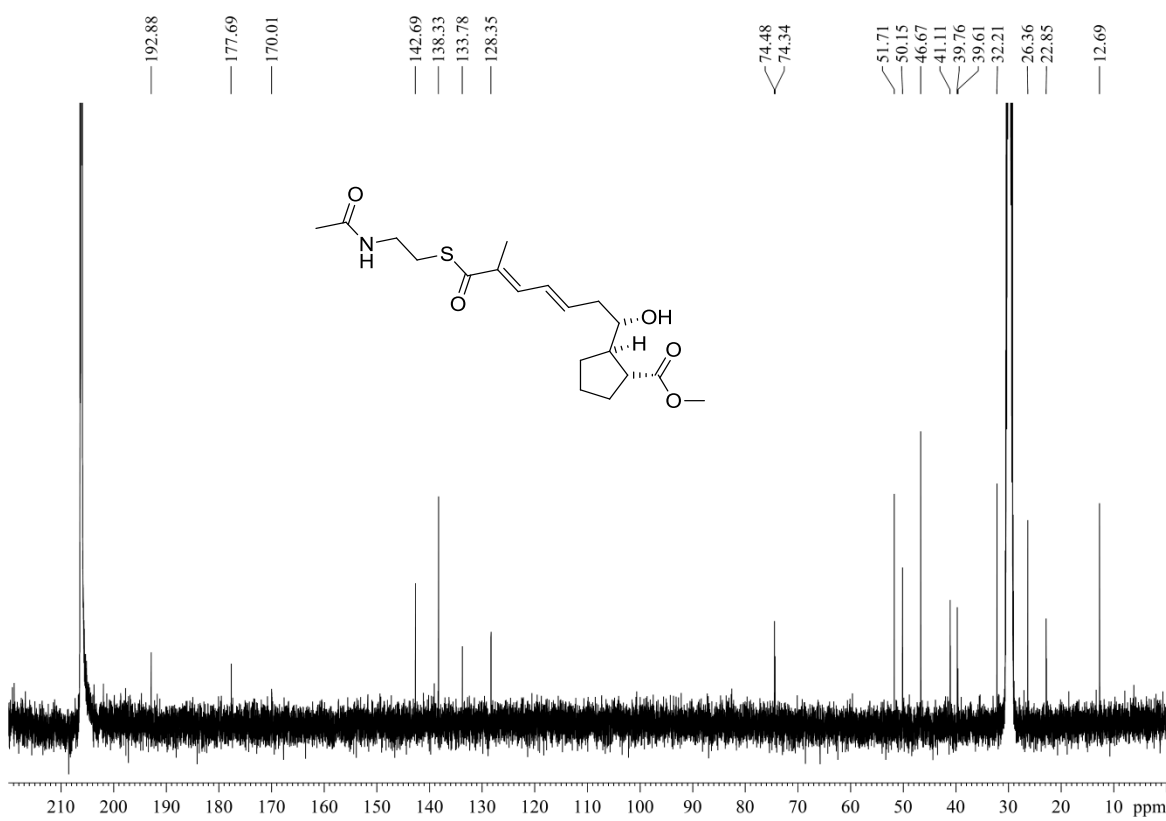

CDCl<sub>3</sub>, 400 MHz

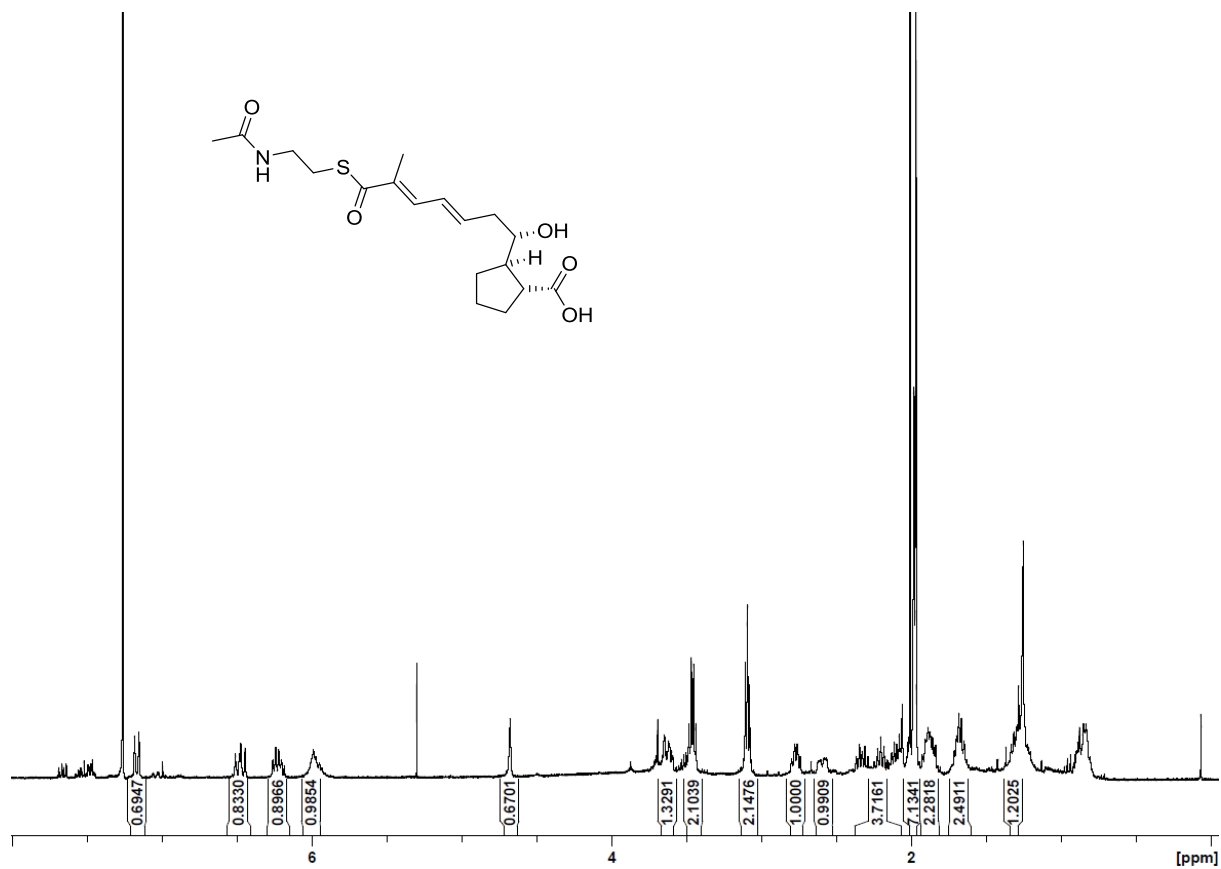

CDCl<sub>3</sub>, 100 MHz

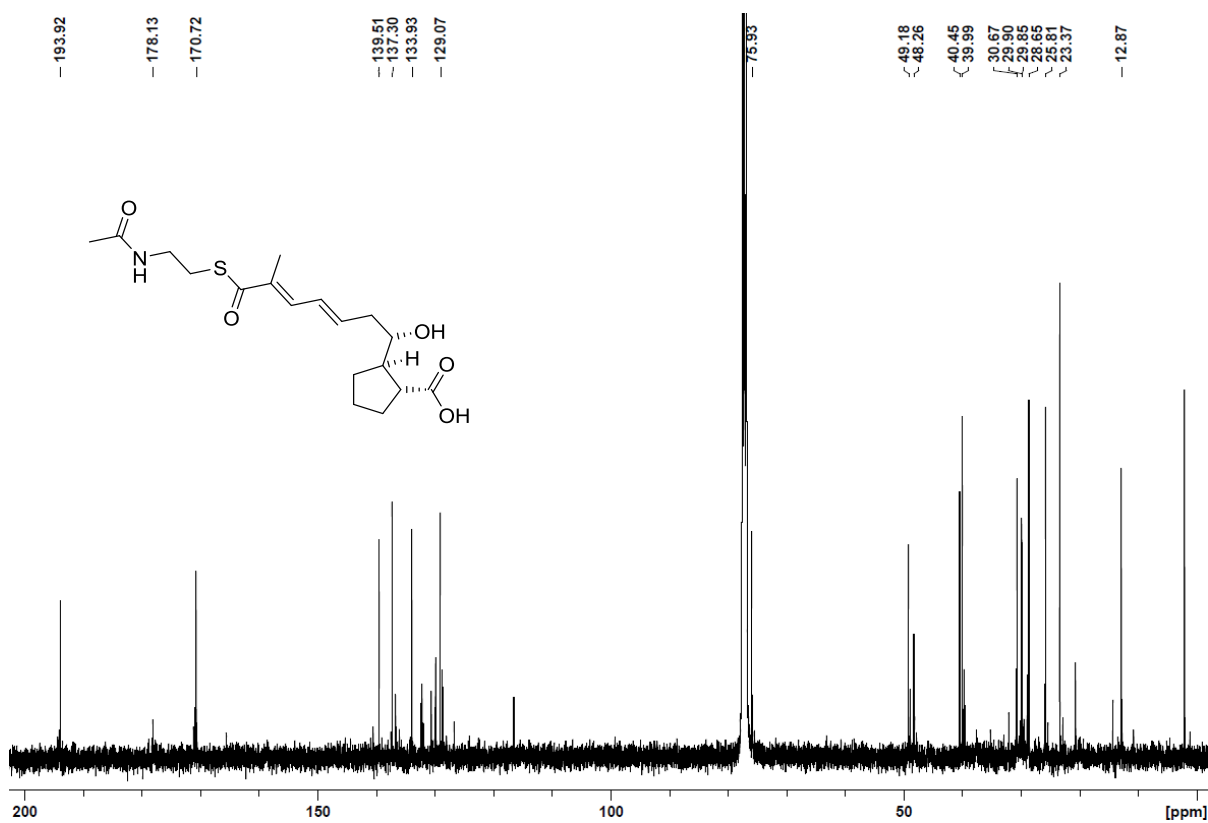

# Mass spectra

Kandzióra  
NK 214 69 (0.782) AM (Cen,5, 69.00, Ar,5000.0,196.96,1.00,LS 3)

LCT

08-Aug-2013  
1: TOF MS ES+  
2.25e+002

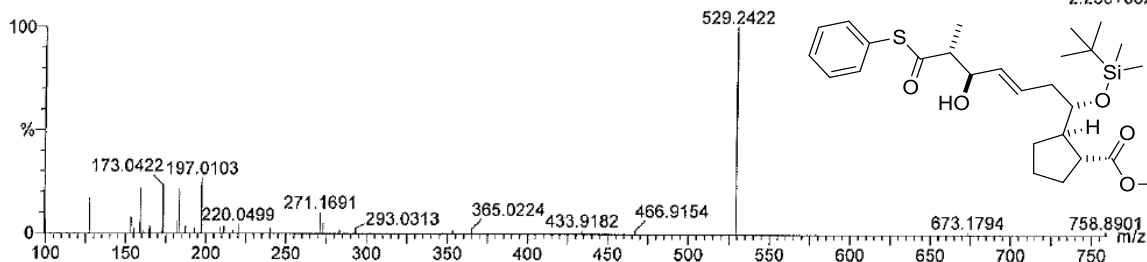

Minimum: -1.5  
Maximum: 6.0 5.0 50.0

| Mass     | Calc. Mass | mDa  | PPM  | DBE  | i-FIT | Formula            |
|----------|------------|------|------|------|-------|--------------------|
| 529.2422 | 529.2420   | 0.2  | 0.4  | 7.5  | n/a   | C27 H42 O5 Na S Si |
|          | 529.2414   | 0.8  | 1.5  | 8.5  | n/a   | C27 H38 O9 Na      |
|          | 529.2413   | 0.9  | 1.7  | 15.5 | n/a   | C33 H37 O4 S       |
|          | 529.2410   | 1.2  | 2.3  | 15.5 | n/a   | C32 H37 O5 Si      |
|          | 529.2438   | -1.6 | -3.0 | 11.5 | n/a   | C29 H37 O9         |
|          | 529.2444   | -2.2 | -4.2 | 10.5 | n/a   | C29 H41 O5 S Si    |
|          | 529.2445   | -2.3 | -4.3 | 3.5  | n/a   | C23 H42 O10 Na Si  |
|          | 529.2447   | -2.5 | -4.7 | 3.5  | n/a   | C24 H42 O9 Na S    |

Kandzióra  
NK 124 290 (2.972) AM (Cen,5, 70.00, Ar,9000.0,556.28,0.70,LS 5)

Q-ToF Premier UPLC-MS

19-Jul-2012  
16:14:58  
1: TOF MS ES+  
1.25e+004

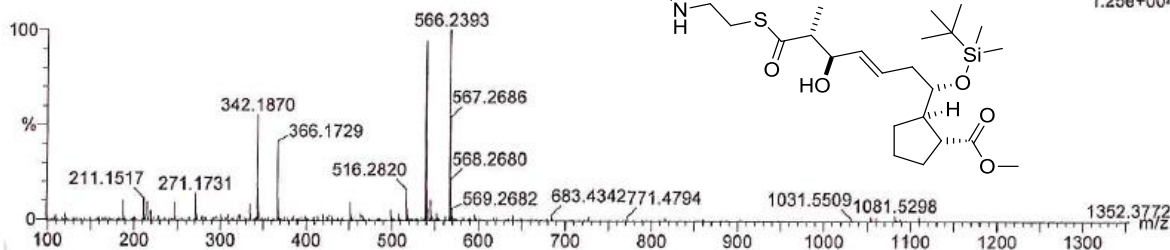

Minimum: -1.5  
Maximum: 6.0 5.0 51.0

| Mass     | Calc. Mass | mDa  | PPM  | DBE | i-FIT | Formula           |
|----------|------------|------|------|-----|-------|-------------------|
| 516.2820 | 516.2815   | 0.5  | 1.0  | 4.5 | 0.1   | C25 H46 N O6 S Si |
|          | 516.2826   | -0.6 | -1.2 | 3.5 | 0.4   | C27 H50 N S4      |
|          | 516.2824   | -0.4 | -0.8 | 3.5 | 0.6   | C26 H50 N O S3 Si |
|          | 516.2817   | 0.3  | 0.6  | 4.5 | 3.5   | C26 H46 N O5 S2   |
|          | 516.2809   | 1.1  | 2.1  | 5.5 | 9.7   | C25 H42 N O10     |
|          | 516.2842   | -2.2 | -4.3 | 0.5 | 19.1  | C22 H46 N O10 S   |

Kandiziora

Q-ToF Premier UPLC-MS

19-Jul-2012  
16:14:58  
1: TOF MS ES+  
8.00e+003

NK 124 202 (2.072) AM (Cen,5, 70.00, Ar,9000.0,556.28,0.70,LS 5)

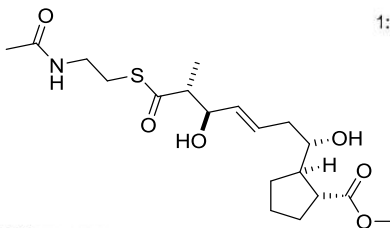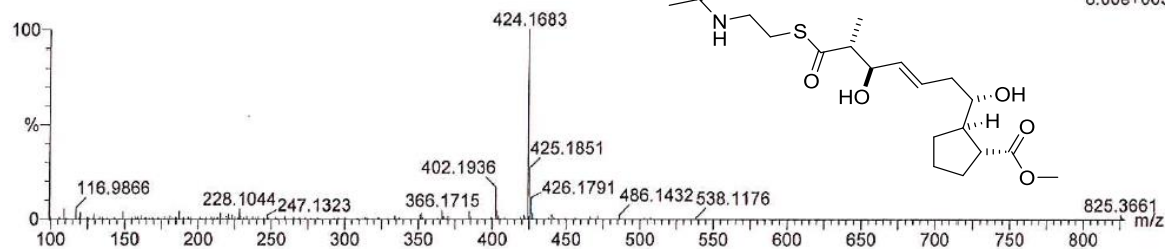

Minimum: -1.5  
Maximum: 6.0 5.0 51.0

| Mass     | Calc. Mass | mDa  | PPM  | DBE | i-FIT | Formula        |
|----------|------------|------|------|-----|-------|----------------|
| 402.1936 | 402.1917   | 1.9  | 4.7  | 9.5 | 0.2   | C22 H28 N O6   |
|          | 402.1950   | -1.4 | -3.5 | 4.5 | 0.8   | C19 H32 N O6 S |
|          | 402.1925   | 1.1  | 2.7  | 8.5 | 2.2   | C23 H32 N O S2 |

Kandiziora

LCT

07-Jan-2013  
1: TOF MS ES+  
3.39e+002

NK 155 A 147 (1.663) AM (Cen,5, 85.00, Ar,0.0,392.92,1.00,LS 5)

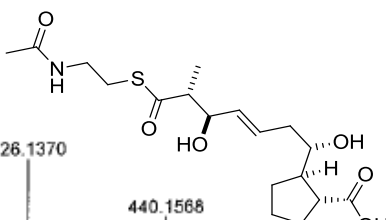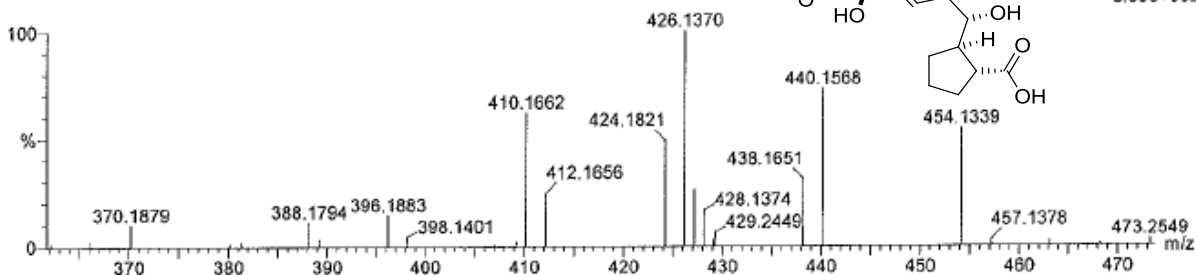

Minimum: -1.5  
Maximum: 6.0 20.0 50.0

| Mass     | Calc. Mass | mDa | PPM  | DBE  | i-FIT | Formula           |
|----------|------------|-----|------|------|-------|-------------------|
| 388.1794 | 388.1794   | 0.0 | 0.0  | 4.5  | n/a   | C18 H30 N O6 S    |
|          | 388.1770   | 2.4 | 6.2  | 1.5  | n/a   | C16 H31 N O6 Na S |
|          | 388.1760   | 3.4 | 8.8  | 9.5  | n/a   | C21 H26 N O6      |
|          | 388.1736   | 5.8 | 14.9 | 6.5  | n/a   | C19 H27 N O6 Na   |
|          | 388.1735   | 5.9 | 15.2 | 13.5 | n/a   | C25 H26 N O S     |

Kandziara

Q-ToF Premier UPLC-MS

05-Apr-2013  
14:23:08  
1: TOF MS ES+  
1.74e+003

NK166\_crude 299 (3.065) AM (Cen,4, 70.00, Ar,10000.0,556.28,0.70,LS 10)

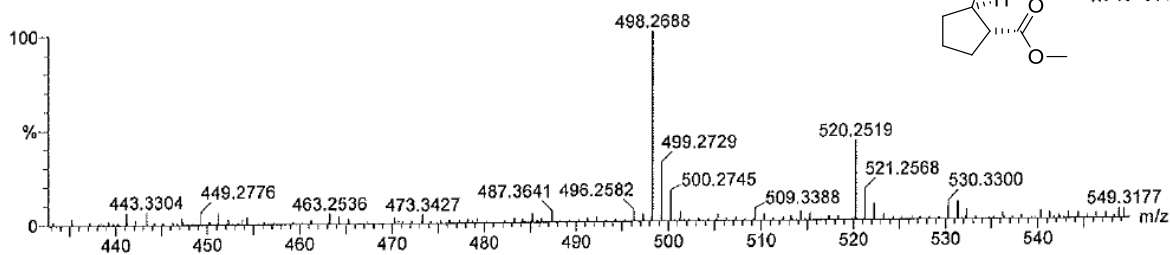

Minimum: -1.5  
Maximum: 6.0 20.0 51.0

| Mass     | Calc. Mass | mDa  | PPM  | DBE  | i-FIT | Formula           |
|----------|------------|------|------|------|-------|-------------------|
| 498.2688 | 498.2678   | 1.0  | 2.0  | 10.5 | 2.4   | C29 H40 N O4 S    |
|          | 498.2676   | 1.2  | 2.4  | 10.5 | 8.5   | C28 H40 N O5 Si   |
|          | 498.2709   | -2.1 | -4.2 | 5.5  | 3.5   | C25 H44 N O5 Si S |
|          | 498.2651   | 3.7  | 7.4  | 14.5 | 24.7  | C32 H40 N Si S    |
|          | 498.2644   | 4.4  | 8.8  | 15.5 | 7.3   | C32 H36 N O4      |
|          | 498.2617   | 7.1  | 14.2 | 19.5 | 35.5  | C35 H36 N Si      |

Kandziara

Q-ToF Premier UPLC-MS

08-Aug-2013  
14:29:20  
1: TOF MS ES+  
2.84e+003

NK 220 257 (2.898) AM (Cen,5, 90.00, Ar,10000.0,556.28,0.70,LS 5)

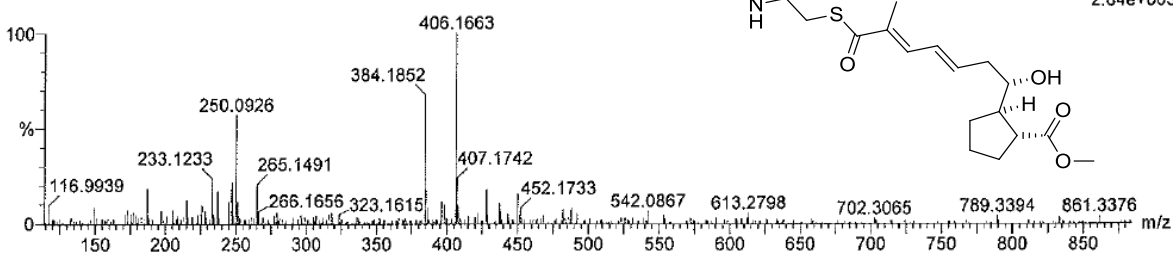

Minimum: -1.5  
Maximum: 6.0 15.0 51.0

| Mass     | Calc. Mass | mDa  | PPM   | DBE  | i-FIT | Formula           |
|----------|------------|------|-------|------|-------|-------------------|
| 406.1663 | 406.1664   | -0.1 | -0.2  | 5.5  | 2.0   | C19 H29 N O5 Na S |
|          | 406.1654   | 0.9  | 2.2   | 13.5 | 38.4  | C24 H24 N O5      |
|          | 406.1688   | -2.5 | -6.2  | 8.5  | 2.0   | C21 H28 N O5 S    |
|          | 406.1689   | -2.6 | -6.4  | 1.5  | 61.9  | C15 H29 N O10 Na  |
|          | 406.1630   | 3.3  | 8.1   | 10.5 | 40.5  | C22 H25 N O5 Na   |
|          | 406.1629   | 3.4  | 8.4   | 17.5 | 35.6  | C28 H24 N S       |
|          | 406.1713   | -5.0 | -12.3 | 4.5  | 45.6  | C17 H28 N O10     |
|          | 406.1605   | 5.8  | 14.3  | 14.5 | 24.1  | C26 H25 N Na S    |

Kandziora  
NK EA 11, neg 231 (2.184) AM (Cen,4, 60.00, Ar,9000.0,554.26,0.70,LS 10)

1: TOF MS ES-  
214

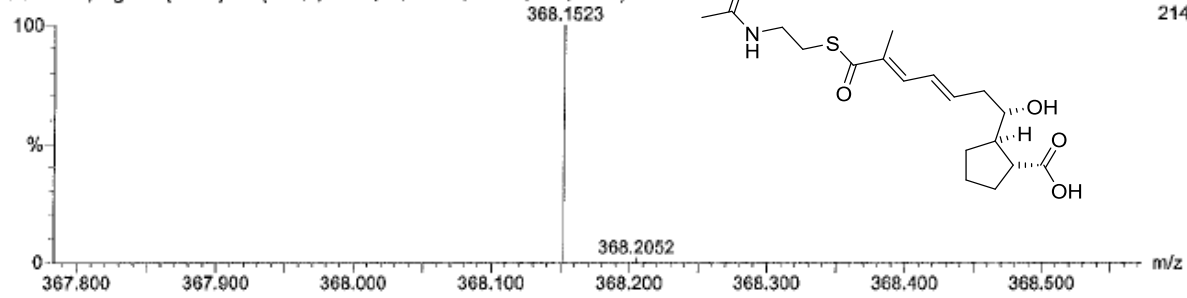

Minimum: -1.5  
Maximum: 20.0 10.0 50.0

| Mass     | Calc. Mass | mDa   | PPM   | DBE  | i-FIT     | Formula            |
|----------|------------|-------|-------|------|-----------|--------------------|
| 368.1523 | 368.1586   | -6.3  | -17.1 | 8.5  | 5546118.0 | C18 H23 N3 O4 Na   |
|          | 368.1474   | 4.9   | 13.3  | 8.5  | 5546118.5 | C19 H23 N O5 Na    |
|          | 368.1532   | -0.9  | -2.4  | 6.5  | 5546118.5 | C18 H26 N O5 S ✓   |
|          | 368.1709   | -18.6 | -50.5 | 6.5  | 5546119.0 | C18 H26 N O7       |
|          | 368.1409   | 11.4  | 31.0  | 8.5  | 5546119.5 | C18 H23 N3 O2 Na S |
|          | 368.1359   | 16.4  | 44.5  | 12.5 | 5546119.5 | C18 H18 N5 O4      |
|          | 368.1545   | -2.2  | -6.0  | 11.5 | 5546120.5 | C19 H22 N5 O S     |
|          | 368.1723   | -20.0 | -54.3 | 11.5 | 5546121.0 | C19 H22 N5 O3      |
|          | 368.1354   | 16.9  | 45.9  | 6.5  | 5546121.5 | C18 H26 N O3 S2    |
|          | 368.1718   | -19.5 | -53.0 | 5.5  | 5546122.0 | C19 H30 N O2 S2    |

Kandziora  
NK 094 319 (3.259) AM (Cen,5, 99.00, Ar,8000.0,556.28,0.70,LS 2)

Q-ToF Premier UPLC-MS

13-Dec-2011  
14:25:31  
1: TOF MS ES+  
8.78e+003

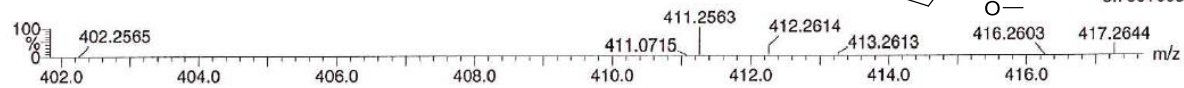

Minimum: -1.5  
Maximum: 6.0 5.0 51.0

| Mass     | Calc. Mass | mDa  | PPM  | DBE | i-FIT | Formula           |
|----------|------------|------|------|-----|-------|-------------------|
| 411.2563 | 411.2567   | -0.4 | -1.0 | 4.5 | 2.3   | C22 H39 O5 Si     |
|          | 411.2571   | -0.8 | -1.9 | 3.5 | 306.9 | C21 H43 O2 Si3    |
|          | 411.2547   | 1.6  | 3.9  | 0.5 | 257.0 | C19 H44 O2 Na Si3 |
|          | 411.2543   | 2.0  | 4.9  | 1.5 | 16.7  | C20 H40 O5 Na Si  |

Kandziora

Q-ToF Premier UPLC-MS

20-Mar-2013  
09:44:16  
1: TOF MS ES+  
5.48e+002

NK 163-C 235 (2.412) AM (Cen,5, 92.00, Ar,10000.0,556.28,0.70,LS 5)

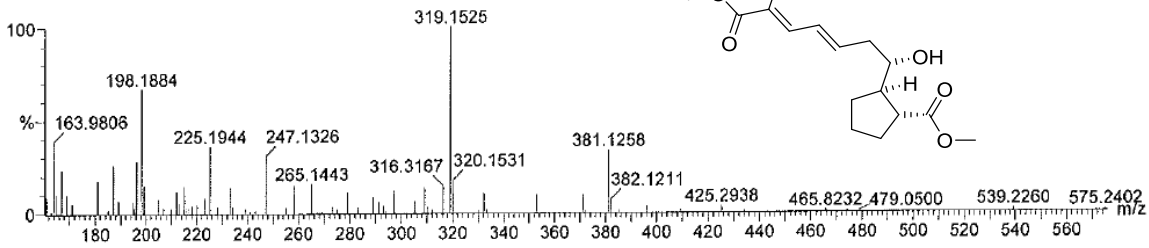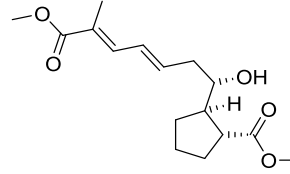

Minimum: -1.5  
Maximum: 6.0 20.0 51.0

| Mass     | Calc. Mass | mDa  | PPM  | DBE  | i-FIT | Formula       |
|----------|------------|------|------|------|-------|---------------|
| 319.1525 | 319.1521   | 0.4  | 1.3  | 4.5  | 0.1   | C16 H24 O5 Na |
|          | 319.1545   | -2.0 | -6.3 | 7.5  | 1.4   | C18 H23 O5    |
|          | 319.1487   | 3.8  | 11.9 | 16.5 | 12.7  | C25 H19       |
|          | 319.1463   | 6.2  | 19.4 | 13.5 | 8.9   | C23 H20 Na    |

Kandziora

Q-ToF Premier UPLC-MS

15-Dec-2011  
08:57:04  
1: TOF MS ES+  
9.64e+002

NK 101 341 (3.487) AM (Cen,5, 61.00, Ar,8000.0,556.28,0.70,LS 5)

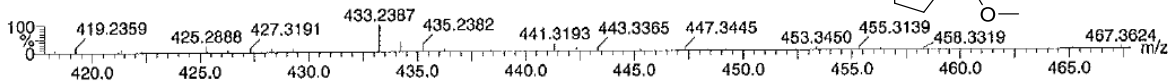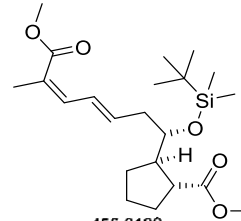

Minimum: -1.5  
Maximum: 6.0 5.0 51.0

| Mass     | Calc. Mass | mDa  | PPM  | DBE | i-FIT | Formula           |
|----------|------------|------|------|-----|-------|-------------------|
| 433.2387 | 433.2386   | 0.1  | 0.2  | 4.5 | 65.3  | C22 H38 O5 Na Si  |
|          | 433.2390   | -0.3 | -0.7 | 3.5 | 17.6  | C21 H42 O2 Na Si3 |

Kandziora

Q-ToF Premier UPLC-MS

13-Dec-2011  
14:42:55  
1: TOF MS ES+  
6.56e+002

NK 101 265 (2.716) AM (Cen,5, 62.00, Ar,8000.0,556.28,0.70,LS 5)

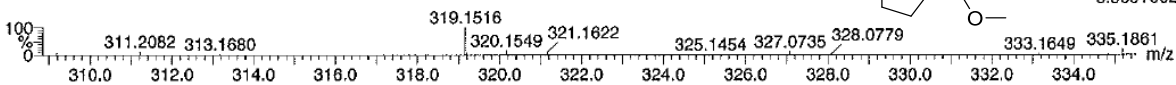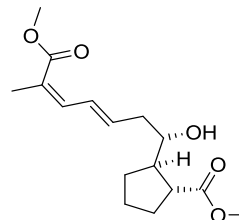

Minimum: -1.5  
Maximum: 6.0 5.0 51.0

| Mass     | Calc. Mass | mDa  | PPM  | DBE | i-FIT | Formula       |
|----------|------------|------|------|-----|-------|---------------|
| 319.1516 | 319.1521   | -0.5 | -1.6 | 4.5 | 17.3  | C16 H24 O5 Na |
